# Supplementary material for: Qualitative accounts from Syrian mental health professionals: shared realities in the context of conflict and forced displacement
Source: PubMed Central journal article supplement — BMJ Open. 2020 May 18;10(5):e034291. doi: 10.1136/bmjopen-2019-034291 (PMC7239525; doi:10.1136/bmjopen-2019-034291), 2020-05-18
Supplement: bmjopen-2019-034291.draft_revisions.pdf [file bmjopen-2019-034291.draft_revisions.pdf]

# BMJ Open

BMJ Open is committed to open peer review. As part of this commitment we make the peer review history of every article we publish publicly available.

When an article is published we post the peer reviewers' comments and the authors' responses online. We also post the versions of the paper that were used during peer review. These are the versions that the peer review comments apply to.

The versions of the paper that follow are the versions that were submitted during the peer review process. They are not the versions of record or the final published versions. They should not be cited or distributed as the published version of this manuscript.

BMJ Open is an open access journal and the full, final, typeset and author-corrected version of record of the manuscript is available on our site with no access controls, subscription charges or pay-per-view fees (<http://bmjopen.bmj.com>).

If you have any questions on BMJ Open's open peer review process please email [info.bmjopen@bmj.com](mailto:info.bmjopen@bmj.com)

# BMJ Open

## Qualitative accounts from Syrian mental health professionals: shared realities in the context of conflict and forced displacement

|                               |                                                                                                                                                                        |
|-------------------------------|------------------------------------------------------------------------------------------------------------------------------------------------------------------------|
| Journal:                      | <i>BMJ Open</i>                                                                                                                                                        |
| Manuscript ID                 | bmjopen-2019-034291                                                                                                                                                    |
| Article Type:                 | Original research                                                                                                                                                      |
| Date Submitted by the Author: | 13-Sep-2019                                                                                                                                                            |
| Complete List of Authors:     | Hamid, Aseel; University College London<br>Scior, Katrina; University College London<br>Williams, Amanda; University College London                                    |
| Keywords:                     | Quality in health care < HEALTH SERVICES ADMINISTRATION & MANAGEMENT, MEDICAL EDUCATION & TRAINING, MENTAL HEALTH, QUALITATIVE RESEARCH, Adult psychiatry < PSYCHIATRY |
|                               |                                                                                                                                                                        |

SCHOLARONE™  
Manuscripts

1  
2  
3 **Qualitative accounts from Syrian mental health professionals: shared realities in**  
4  
5 **the context of conflict and forced displacement**  
6  
7

8 Aseel Hamid<sup>1\*</sup>, Katrina Scior<sup>1</sup> and Amanda C de C Williams<sup>1</sup>  
9

10 <sup>1</sup>Research Department of Clinical, Educational and Health Psychology, University College London,  
11  
12 United Kingdom  
13

14 \*Correspondence: [aseel.hamid@ucl.ac.uk](mailto:aseel.hamid@ucl.ac.uk)  
15  
16  
17  
18  
19  
20  
21  
22  
23  
24  
25  
26  
27  
28  
29  
30  
31  
32  
33  
34  
35  
36  
37  
38  
39  
40  
41  
42  
43  
44  
45  
46  
47  
48  
49  
50  
51  
52  
53  
54  
55  
56  
57  
58  
59  
60

For peer review only

## ABSTRACT

**Objectives.** To explore the impact of the provision of care of forcibly displaced Syrian mental health professionals to Syrians clients in the community given shared experiences and backgrounds with clients. **Design.** A qualitative study using an in-depth semi-structured interview schedule to explore shared realities, self-disclosure and the impact of providing therapy through thematic analysis. **Setting.** Syrian mental health professionals operating in Gaziantep and Istanbul, Turkey were interviewed. **Participants.** Sixteen forcibly displaced Syrian mental health professionals (8 male, 8 female) aged between 24 and 54 years ( $M = 35$  years,  $SD = 8.3$  years) who provided care to the displaced Syrian community in Turkey. **Results.** All workers described having a shared reality with their clients as helpful in therapy and a smaller proportion described it as a vulnerability. All described their work with Syrian clients as fulfilling while most described it as distressing, all referring to self-care, most referring to supervision or peer-support and some referring to personal therapy as a means to cope. **Conclusions.** This study provides the first insight into the shared experiences of the ongoing trauma, loss and violations resulting from the ongoing Syrian conflict from the perspective of Syrian mental health professionals, adding to the literature of the professional issues and ethical duty to protect health workers in conflict settings.

### Strengths and limitations of this study

- This study is the first to explore the experiences of Syrian mental healthcare providers, and the first to investigate the shared realities of Syrian mental healthcare providers and their Syrian clients.

- The study shows how, having a shared reality of conflict and displacement with clients, although was at times distressing it was a helpful in providing psychological support.
- This study's findings have implications for the ethical duty to protect Syrian healthcare workers through the provision adequate support
- Interviews are limited to a small sample of forcibly displaced Syrian mental healthcare providers working in Turkey

## **BACKGROUND**

The ongoing Syrian conflict, seen as the worst humanitarian crisis of our time [1], has led to the displacement of half of Syria's population with over 13.1 million Syrians in need of humanitarian assistance leading to an ongoing public health crisis [2]. The Syrian healthcare community has been a target of the military strategy led by the Syrian government with reports of 478 attacks on medical facilities with 830 medical personnel killed since the beginning of the conflict [3] and ongoing systematic violations of international humanitarian law[4,5]. The majority of published literature sheds light on the impact of medical personnel and no literature exists on the impact of the conflict on mental health workers.

Widely endorsed global mental health programmes and guidelines emphasise the importance of working with communities and influential community figures, and where specialist support is required, guidelines recommend training local community workers in evidence based trauma therapies such as EMDR and trauma-focussed cognitive behavioural therapy [6-8]. Consequently expatriate Syrian mental health professionals (MHPs), various Syrian non-governmental organisations (NGOs) and international NGOs (INGOs) have made initiatives to provide training and supervision

1  
2  
3 for evidence-based therapies to displaced Syrians [9-11]. While this model of training  
4 mobilises resources, reduces language barriers and enhances cultural sensitivity, it  
5  
6 also comes with challenges including high caseloads with reduced supervision, with  
7  
8 potential negative emotional consequences.  
9  
10  
11

12  
13 The term 'shared traumatic reality' refers to situations where both  
14 professional and client have been exposed to the same communal disaster, and  
15  
16 'double exposure' refers to health professionals' exposure both as professionals  
17  
18 providing a service and as members of the community [12,13]. Most studies of a  
19  
20 shared traumatic reality are based on quantitative enquiry. A qualitative meta-  
21  
22 synthesis of studies of the impact of trauma work on trauma workers found themes  
23  
24 related to emotional and somatic reactions to trauma work such as sadness,  
25  
26 helplessness, nausea and despair, changes to schemas and behaviours such as  
27  
28 questioning themselves and their lives and perceiving the world as unsafe [14]. While  
29  
30 much research focuses on the potential negative consequences, recent research is  
31  
32 acknowledging the potential for shared resilience in a traumatic reality [15].  
33  
34  
35  
36  
37  
38  
39

40 Very little literature exists on Syrian MHPs warranting in-depth exploration to  
41 understand their context and experience. Despite intra- and inter-variations within  
42  
43 Arab cultures, the influence of Syrian culture contributes to differential  
44  
45 conceptualisations, processes and experiences such as kissing and hugging strangers  
46  
47 in same-sex greetings, asking about family and offering food or drink given the deep-  
48  
49 rooted values of family and hospitality in Arab culture [16,17] likely influencing the  
50  
51 MHP-client dyad. Given these Syrian-Arab cultural frameworks and the shared  
52  
53 ongoing trauma reality of Syrian MHPs and clients, it is unclear what this reality looks  
54  
55 like and it how differs (or not) from a context of Western mental health care.  
56  
57  
58  
59  
60

1  
2  
3 In a typical Western therapeutic context, self-disclosure is used cautiously,  
4  
5 occurs infrequently and often relates of MHPs' professional background rather than  
6  
7 personal details [18]. Disasters, regardless of geographical location, often create  
8  
9 boundary ambiguity between the personal and professional with the penetration of  
10  
11 demands from neighbours, friends and acquaintances which can lead to burnout and  
12  
13 strong countertransference arousal responses [19]. A shared traumatic reality  
14  
15 creates a feeling of universality leading to increased MHP self-disclosure [20].  
16  
17 Appropriate self-disclosure allows the MHP, as the "wounded healer" [21], to show  
18  
19 their resourcefulness instil hope in clients of healing and recovery [22,23]; at the  
20  
21 same time, increased self-disclosure within a shared reality can increase MHPs'  
22  
23 vulnerability for distress [24,25].  
24  
25  
26  
27  
28  
29

30 It is unclear how or whether MHPs' self-disclosure, in any capacity, features  
31  
32 within these therapeutic dyads. It is expected that a shared reality in the context of  
33  
34 Syrian culture may increase likelihood of MHP self-disclosure, particularly within  
35  
36 Turkey where Syrians are living within a small city, and that there are very few MHPs  
37  
38 relative to residents. Many Syrian MHPs are themselves forcibly displaced, have  
39  
40 witnessed and experienced traumatic events and, given the ongoing nature of the  
41  
42 conflict, have an ongoing sense of hopelessness and loss. The Syrian MHP-client dyad  
43  
44 creates a shared reality that, to the researcher's knowledge, has not been explored.  
45  
46 An investigation of this context is warranted, along with what allows Syrian MHPs to  
47  
48 continue to function in their capacity as healers, and what coping consists of within  
49  
50 a displaced Syrian context.  
51  
52  
53  
54  
55  
56

57 This research aims to generate knowledge carved directly from Syrian MHPs  
58  
59 trained to provide evidence based therapies through communicating with them in  
60

1  
2  
3 their native Arabic language to understand how their training is translated within a  
4  
5 Syrian culture and displacement context, while seeking better understanding of the  
6  
7 potential harmful emotional impact given their own background and setting.  
8  
9

## 10 **METHODS**

11  
12 Semi-structured interviews were conducted with forcibly displaced Syrian MHPs  
13  
14 across two cities in Turkey, Istanbul and Gaziantep, a city 97 km north of Aleppo,  
15  
16 Syria, in August and November 2017. Turkey is home to the largest number of Syrian  
17  
18 refugees and the majority live along the southern border, with around half a million  
19  
20 Syrians living in Gaziantep, a city used as a hub for cross-border support, hosting  
21  
22 Syrian and INGOs. This research was conducted in collaboration with Trauma Aid UK  
23  
24 who provide specialist trauma training for Syrian health professionals in Turkey. The  
25  
26 study aimed to investigate the impact of the shared culture and experiences of  
27  
28 forcibly displaced Syrian MHPs and their Syrian clients, the incidence and impact of  
29  
30 MHPs' disclosure of shared experiences and the impact of providing therapy on  
31  
32 Syrian MHPs.  
33  
34  
35  
36  
37  
38  
39

## 40 **Participants**

41  
42 Eligible participants were a purposive sample of forcibly displaced Syrian MHPs  
43  
44 residing in Turkey, the largest host of Syrian refugees worldwide, work with Syrian  
45  
46 clients. All participants were given information sheets and consent forms (in Arabic)  
47  
48 and were told prior to interview that participation was entirely voluntary. Permission  
49  
50 for audio recording was sought and granted. All interviews were conducted in Arabic  
51  
52 by the first author (AH) either in Gaziantep ( $n = 11$ ), Istanbul ( $n = 3$ ) or via Skype ( $n =$   
53  
54 2) and lasted between 40 and 70 minutes. The sample size was determined by data  
55  
56 saturation; the degree to which new data repeated what was expressed in previous  
57  
58  
59  
60



1  
2  
3 data [26].  
4

### 5 **Measurement and analysis**

6  
7  
8 The interview schedule was guided by the research questions and structured in a way  
9  
10 to encourage participants to tell their story using three basic narrative structures; a  
11  
12 beginning, in which the setting was described, a middle which contains a series of  
13  
14 obstacles and attempted solutions and an ending or resolution [27]. Given that little  
15  
16 is known in the literature about this sample, open-ended, exploratory questions were  
17  
18 used [28] as well as externalising questions derived from a narrative approach to  
19  
20 encourage participants to feel more comfortable to have an open dialogue [29]. The  
21  
22 research also aimed to be grounded in examples and these were elicited where  
23  
24 relevant [30].  
25  
26  
27  
28

29  
30 AH conducted the coding and thematic analysis using an inductive approach  
31  
32 following the six steps recommended by Braun and Clark [31] using NVivo 11  
33  
34 software. AH and two bilingual British Syrian health professionals transcribed the  
35  
36 interview from Arabic audio to English script and each script was read and reread and  
37  
38 systematically coded, giving full and equal attention to each item. A peer researcher  
39  
40 independently coded a transcript using the same procedure outlined above, and any  
41  
42 discrepancies were resolved through discussion. AH used mind maps to construct a  
43  
44 thematic structure while being mindful of personal biases and influences. These  
45  
46 themes were reviewed with the research team (KS, AW) to discuss whether this was  
47  
48 an accurate depiction; consequently themes were renamed and reorganised.  
49  
50  
51  
52

### 53 **Patient and public involvement**

54  
55 No patients or members of the public were involved in the conduct of this research.  
56  
57

## 58 **RESULTS**

### Situating the sample and context

This sample consisted of 16 forcibly displaced Syrian MHPs residing in Turkey aged between 24 and 54 years ( $M = 35$ ,  $SD = 8.3$ ), 8 males and 8 females, 12 psychologists and 4 psychiatrists.

Syrian MHPs spoke of a number of facilitators. All participants referred to a number of specific psychological tools such as receiving psychological therapy training sessions as well as non-specific tools such as adopting an empathic, non-judgmental stance. Flexible ways of working through Skype or Whatsapp and providing therapy in people's homes also facilitated therapy. Participants spoke of the importance of psychosocial support including the use of psychological first aid and linking clients to activities and social centres.

"The main thing is to provide people with their main needs, not only food and water but also their human rights. We tried to change the mentality of the psychologists and the psychological workers to be able to support the people affected by the crisis." (P5)

There were also a number of barrier. Half the participants reported feeling under pressure due to high workloads and consequently only being able to provide a limited number of sessions. Participants stated that clients were reluctant to talk about their mental health problems and traumatic experiences, especially sexual abuse, with a general stigma present within the Syrian community accompanied by a lack of awareness of psychology.

"They always say: 'Am I a crazy person?' I face this word 'crazy' a lot."  
(P1)

Some expressed the need for more trained therapists, risk management staff

1  
2  
3 and sensitive interpreters. Financial difficulties were described both as a barrier to  
4  
5 the provision of adequate mental health care and training and to patients accessing  
6  
7 services due to not being able to travel to sessions.  
8  
9

### 10 **Main Themes**

11  
12 Analysis led to two overarching themes of shared characteristics and personal  
13  
14 impact, with six themes and ten sub-themes; Figure 1 illustrates these themes.  
15  
16  
17  
18  
19  
20  
21  
22  
23  
24  
25  
26  
27  
28  
29  
30  
31  
32  
33  
34  
35  
36  
37  
38  
39  
40  
41  
42  
43  
44  
45  
46  
47  
48  
49  
50  
51  
52  
53  
54  
55  
56  
57  
58  
59  
60

For peer review only

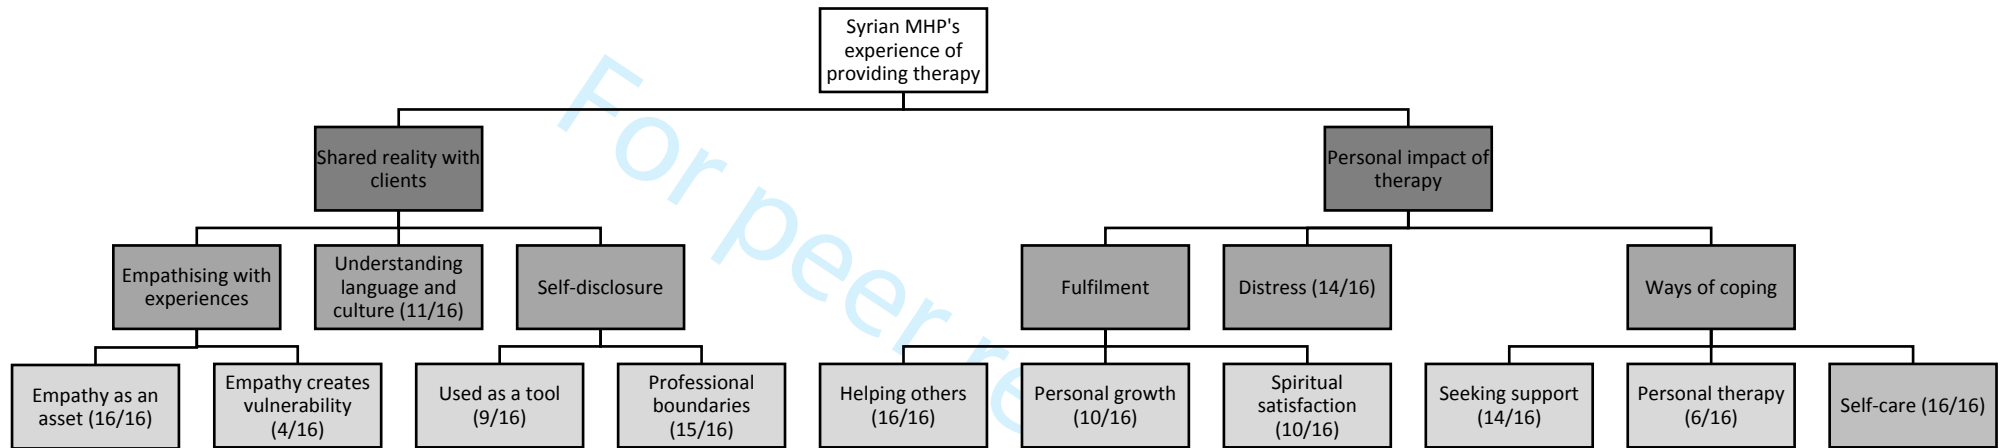

Figure 1. Thematic Map

### *Shared reality*

#### Empathising with experiences

Syrian MHPs lived through war and displacement themselves, enabling them to empathise with clients' experience. All referred to this as an asset creating better understanding and trust within therapy.

"...they have family who has been detained and I have family who is detained. Some have family who they have not seen for a long time and I too have not seen my family for a long time, because of the war...It lets you be more empathic, sometimes you be may be able to relieve him more...it makes you have more motivation, it makes you feel how much he is literally suffering."

(P3)

A smaller proportion of MHPs gave examples of how sharing a traumatic reality led to unpleasant reminders, with two preferring not to go into too much detail to avoid over-identification.

"...a male patient, he was in prison and was subject to a lot of torture...I always heard about these things but I never thought I will see it in reality. It was hard for me because afterwards I thought that my brother [who was imprisoned and possibly killed in Syria] might have gone through the same things" (P1)

"I do not go into a lot of details with [the client] about the problem, so as not to empathise to the extent that I feel that our problem is one" (P16)

#### Understanding language and culture

MHPs commented on how their nuanced understanding of Syrian dialects allows them to link a clients' dialect to their cultural, religious, political and social contexts. Their understanding of cultural and religious norms and practices such as the male-female relationship in relation

1  
2  
3 to disclosing emotional experiences, physical touch and using words of comfort appropriately  
4  
5 according to a clients' spiritual context was a useful tool.  
6  
7

8 "We tried in our work to have females treat males but it did not work. This is  
9  
10 in our culture, it is shameful for males to talk about his problems with females  
11  
12 and this is why males prefer to talk with male doctor. So we started to refer  
13  
14 males to males and females to us [females]." (P1)  
15  
16

17 "So if [a client] says my son became a martyr, you don't just say 'oh ok' and  
18  
19 write it down and then what... you make them feel that you heard them...and  
20  
21 say oh Allah rest his soul', and Allah willing he's now in heaven and may his  
22  
23 martyrdom be a reason for your redemption" (P3)  
24  
25  
26

#### 27 Self-disclosure

28  
29 The majority of Syrian MHPs used self-disclosure as a tool in therapy with varied uses; to help  
30  
31 clients see the MHP as an example of having overcome difficulties given their shared  
32  
33 experience, or for political purposes to build the clients' trust given the tensions and conflicts  
34  
35 within in Syria, particularly if clients come from different areas. One MHP noted that:  
36  
37  
38

39 "...[most of my clients] are originally from rural Aleppo and they speak in  
40  
41 different accent as I come from Douma...Patients ask me where I am from. This  
42  
43 question could come from the fear inside them that I have different political  
44  
45 views or I might report them to the Syrian regime. In this case, I tell them that  
46  
47 I am from Douma which they know that it has gone through the same  
48  
49 experience as rural Aleppo." (P14)  
50  
51  
52  
53  
54  
55  
56  
57  
58  
59  
60

1  
2  
3 All MHPs gave disclaimers regarding self-disclosure, either relating to professional  
4 boundaries, their psychological approach or their social context. MHPs were more likely to  
5 use disclosure to reduce perceived power imbalances:  
6  
7  
8  
9

10 “...when he comes to see a therapist or doctor, he thinks that the  
11 therapist/doctor comes from another planet and doesn't know the struggle  
12 that he goes through. So we talk about general issues like there's a lot of traffic,  
13 public transport is expensive., rent is going up for us as Syrians, living in Turkey  
14 is expensive ...he feels that you've experienced the same struggle...” (P3)  
15  
16  
17  
18  
19  
20  
21  
22

23 MHPs spoke about the importance of the use of professional boundaries as a way to  
24 protect the client, themselves and the relationship using contracts, fixed hours of contact and  
25 placing responsibility onto clients.  
26  
27  
28

29 “Sometimes the relationship becomes unprofessional when I start to use the  
30 phone to call them and see how they are doing. When [I feel this]... I reduce  
31 the number of sessions and give her the responsibility to make her...life  
32 choices.” (P10)  
33  
34  
35  
36  
37  
38  
39

40 “This is what made a difference - listening to stories made me stronger and  
41 now I was able to override this feeling [of being overwhelmed by traumatic  
42 stories] and have immunity and I put a separation between me and the client  
43 so that I don't get affected.” (P16)  
44  
45  
46  
47  
48  
49

### 50 *Personal impact of therapy*

#### 51 Fulfilment

52 All MHPs spoke about how knowing that they have helped and relieved their clients was  
53 rewarding, and for some, this acted as a main motivator to help overcome the emotional  
54 difficulties of this work:  
55  
56  
57  
58  
59  
60

1  
2  
3 “...the thing that protects me is to complete therapy [with a client] and see the  
4  
5 improvement and change that happened. The person who came completely  
6  
7 destroyed and began to love life... when you see the change...this is the biggest  
8  
9 thing that pushes me through difficulties” (P16)  
10  
11  
12

13 MHPs spoke about how their clients taught them things that enabled them to grow  
14  
15 emotionally and that listening to difficult and traumatic stories over the years helped to make  
16  
17 them more immune to distress as MHPs:  
18  
19

20 “I used to tell my teacher I do not think I can treat people in the future because  
21  
22 I lost my brother... she told me you will be able to do it because you are Syrian  
23  
24 and you know Arabic and you will be a role model for those people who you  
25  
26 will meet. Now [with time] I think this true because when I see Syrians who are  
27  
28 struggling I can feel what they are going though. Jalaluddin Rumi said that the  
29  
30 wound in your heart is the place where light enters you.” (P1)  
31  
32  
33  
34

35 Most of the Syrian MHPs identified as Muslim and most also spoke about gaining  
36  
37 spiritual satisfaction from helping others, with some saying that they felt their purpose was  
38  
39 to be brought from the war to help others who are affected, and others saying they feel  
40  
41 satisfied that God will reward them for their work.  
42  
43

#### 44 Distress

45  
46  
47 Most MHPs spoke about the personal negative impact of clients’ traumatic stories, describing  
48  
49 experiencing secondary traumatic stress and burnout:  
50  
51

52 “At the beginning of my experience I was by myself with a lot of trauma cases  
53  
54 I felt that I was burnt out...and that I was trapped. I was not happy, I started  
55  
56 having nightmares because I was exposed to very big issues such as incest,  
57  
58 physical and sexual assaults, losing body parts and suicide” (P1)  
59  
60



1  
2  
3 “The other day I was working at the orphanage and I saw 11 people in one  
4  
5 day...this is a big number and causes pressure, mental exhaustion and burnout.  
6  
7  
8 Sometimes you're tired and you need to take a day off...your capacity becomes  
9  
10 less...and this is...we all...this is burnout.” (P3)  
11

12  
13 “To be honest, sometimes at the end of the day I feel that I am unable to speak  
14  
15 anymore, around 5.30 when we finish our work” (P4)  
16

17  
18 A number of MHPs mentioned feeling shocked by the reality of the traumatic experiences  
19  
20 that their clients endured:  
21

22  
23 “These were things...I only heard about and did not expect that it existed in  
24  
25 reality and I will see it in the real world.” (P1)  
26

27  
28 “I was shocked by what [the children] went through...” (P10)  
29

30  
31 “I used to think it's unbelievable all this pain happened to us, I can't believe to  
32  
33 this extent; really is it possible that this shelling happened, these things  
34  
35 happened inside prisons?” (P16)  
36

### 37 38 39 Ways of coping

40  
41 All Syrian MHPs had their individual ways of coping with the emotional impact of therapy. All  
42  
43 spoke about the importance of seeking support and increasing their knowledge through  
44  
45 supervision, resources or peer support:  
46

47  
48 “Peer support is also important, your colleagues around you, it is not the same  
49  
50 as supervision but it helps.” (P8)  
51

52  
53 “You need to work with the skills and the responsibilities that you have, rather  
54  
55 than trying to do things you're not qualified for...[K]eeping up with literature,  
56  
57 Cochrane reviews and so on...I try to keep up to date.” (P9)  
58  
59  
60

1  
2  
3 MHPs also spoke about the importance of having support through friends or family to  
4 talk about their own difficulties:  
5

6  
7  
8 “Sometimes when I have problems in my life or with my son, it is hard to always  
9  
10 listen to all people, sometimes it is a very simple thing but you feel you need  
11  
12 someone to ask about you....you just need to talk to someone.” (P4)  
13  
14

15 Six participants spoke about using personal therapy to cope with difficulties so that  
16 they can provide better care to their clients, despite this being stigmatised within the  
17 community and that this was often not spoken about:  
18  
19  
20  
21

22  
23 “Personal therapy is useful. First, it allows me to put myself in my patients’  
24 position, this makes me feel humble. Second, it gives me the chance to explore  
25 the perspectives of other therapists and how they see things. Third, when  
26 there is an issue that is overwhelming, personal therapy gives me the space to  
27 speak out about it”. (PA)  
28  
29  
30  
31  
32  
33

34  
35 “On the social level, people still have stigma about psychology...we don’t tell  
36 each other that we need help but we still go and seek the help. We still have  
37 the stigma about psychology treatment.” (PA)  
38  
39  
40  
41

42 All participants spoke about self-care, often as spending time either with loved ones  
43 or alone without thinking or speaking about work and being around nature:  
44  
45

46  
47 “Gaziantep has a lot of big and beautiful gardens where we go and spend time,  
48 sometimes we meet friends, but also sometimes you feel you just want to be  
49 on your own.” (P4)  
50  
51  
52

53  
54 “My wife has started to follow my cases and understand my work. She says to  
55 me ‘where is the self-care?! You train on self-care but we want you to do self-  
56 care with us!’ [laughter] she’s like let’s go to the ocean this year, so we will go  
57  
58  
59  
60

1  
2  
3 with the kids.” (P9)  
4  
5

## 6 **DISCUSSION**

7  
8 To our knowledge, this is the first study to shed light on the experiences of forcibly displaced  
9  
10 Syrian MHPs providing services to Syrians affected by conflict. This was a qualitative  
11  
12 exploration of challenges faced by Syrian MHPs amongst the shortages of mental health  
13  
14 provision, high caseloads and emotional vulnerability in light of shared traumatic  
15  
16 experiences with clients, while illuminating the satisfaction gained from providing therapy  
17  
18 using multiple means of coping. The shared reality of practitioner and client enhances  
19  
20 empathy and understanding and overcomes language and cultural barriers often present in  
21  
22 these settings where there is a gap between the demand and supply of mental health  
23  
24 services.  
25  
26  
27  
28

29  
30 Published literature, particularly using quantitative methodology, tends to  
31  
32 conceptualise positive and negative impacts of therapy provision as separate and mutually  
33  
34 exclusive entities. It is important to acknowledge their coexistence and interaction. A  
35  
36 qualitative exploration of Sri Lankan MHPs working with Sri Lankan survivors of trauma  
37  
38 described “an accumulated negative emotional impact but also to simultaneously contain  
39  
40 positive, growth-promoting and personally satisfying aspects” [32]. Another qualitative  
41  
42 study of trauma therapists showed the co-occurrence of positive changes co-occur  
43  
44 alongside negative emotional impacts [33].  
45  
46  
47  
48

49  
50 Syrian MHPs spoke about the shock of the human rights abuses inflicted on their  
51  
52 clients by the Syrian government, including torture and sexual abuse, particularly early on in  
53  
54 their working lives. This fits with broader qualitative research capturing shock as a theme  
55  
56 experienced by counsellors in Sydney working in child protection services [34] and child  
57  
58 trauma therapists in America [35]. Similarly, time and experience were key moderators of the  
59  
60

1  
2  
3 negative emotional impact in both studies; more time and experience led to less distress and  
4  
5  
6 overwhelming emotions.  
7

8 Previous research suggests that MHPs' own difficult experiences may facilitate  
9  
10 empathic connection with clients and use countertransference positively in therapy [36]. The  
11  
12 shared reality of all Syrian MHPs facilitated empathy, likely enhancing their sense of  
13  
14 compassion satisfaction and bonding, allowing them to feel more competent in helping their  
15  
16 clients [20]. This shared reality also enabled greater understanding of cultural nuances and  
17  
18 language; an important strength given the lack of available sensitively trained interpreters  
19  
20 and that matching MHPs to clients based on language similarities has been shown to predict  
21  
22 better therapy outcomes [37].  
23  
24  
25  
26

27 In some cases, clients' war-related traumatic experiences reminded Syrian MHPs of  
28  
29 their own experiences and in two instances, MHPs noted not going into too much detail about  
30  
31 the clients' distressing experiences to avoid over-identification. It is unclear whether or how  
32  
33 this may affect the therapy process, particularly when processing or reliving trauma, as  
34  
35 theoretical underpinnings of both EMDR and TF-CBT require clients to bring to mind and/or  
36  
37 verbalise necessary detail. Shared realities likely led to challenges that this data may not have  
38  
39 captured. Literature on ethnic minority therapists working with ethnic minority clients reveals  
40  
41 challenges including therapist over-identification leading to assumptions and potential  
42  
43 clashes in cultural values [38], the latter also likely challenges for Syrian MHPs working with  
44  
45 Syrians residing in a Turkish majority country.  
46  
47  
48  
49

50  
51  
52 Syrian MHPs in this study used self-disclosure cautiously while maintaining  
53  
54 professional boundaries, despite theory on shared trauma in a traumatic reality predicting  
55  
56 greater self-disclosure, blurred boundaries and burnout [12]. It is possible that adherence to  
57  
58 professional boundaries, encouraged by the training sessions that many Syrian MHPs  
59  
60

1  
2  
3 received, contributed to protecting participants from the experience of burnout. Syrian MHPs  
4  
5 in similar social and financial situations to their clients reported using disclosure as a way to  
6  
7 gain common ground, in contrast to more privileged MHPs actively not disclosing. Previous  
8  
9 research with cross-cultural dyads showed that therapist self-disclosure was only perceived  
10  
11 as helpful when used as an “effective strategy for bridging perceived social and power  
12  
13 distance”[39].  
14  
15  
16

17  
18 Longitudinal research with INGO workers showed that social support was associated  
19  
20 with lower levels of depression, burnout, lack of personal accomplishment and greater life  
21  
22 satisfaction [40]; self-care amongst Syrian MHPs was often located in the context of social  
23  
24 support. MHPs need to have insight into their feelings and the ability to differentiate between  
25  
26 the needs of the self and of the client [41]. A number of Syrian MHPs described personal  
27  
28 therapy as a helpful means to do this and as a way to cope with emotional distress despite a  
29  
30 stigma surrounding this. MHPs experience barriers to disclosure of undertaking personal  
31  
32 therapy with negative consequences such as being seen as incompetent [23]. Syrian MHPs  
33  
34 seeking personal therapy likely experience double stigma given that mental health problems  
35  
36 have been described amongst the Syrian community in this research as highly stigmatised, as  
37  
38 well as within Arab communities overall [42].  
39  
40  
41  
42  
43  
44

45 Syrian MHPs collectively experience the ongoing Syrian conflict on a daily basis  
46  
47 through media outlets, while hearing first-hand accounts from clients, family and friends  
48  
49 about the ongoing human rights violations committed in the context of the failure of the  
50  
51 international community and law. This may damage their sense of hope, connection and faith  
52  
53 in humanity. Maintaining optimism and hopefulness are essential aspects of being an  
54  
55 effective trauma therapist [43]. A number of Syrian MHPs’ strong sense of faith in God and  
56  
57 their purpose was a way to make sense of incomprehensible violations and to maintain hope.  
58  
59  
60

1  
2  
3 Spirituality also brought a sense of satisfaction to a number of participants and Syrian MHPs  
4  
5 saw their work as a good deed towards a wider struggle and a wider cause.  
6  
7

8 The findings are subject to some limitations. Given that a large part of recruitment  
9  
10 was through Trauma Aid's channels, there may have been an unspoken message that the  
11  
12 nature of their involvement would be linked to Trauma Aid, despite emphasis on the  
13  
14 voluntary nature of their involvement and the separation of this research. Furthermore, the  
15  
16 information sheet and content of interviews may have led those who are struggling to  
17  
18 understandably opt out, therefore creating a less representative sample and greater  
19  
20 impression of coping. This research is a result of the interaction of a small research team,  
21  
22 including a bilingual interviewer, with a specific group of displaced Syrian MHPs in the specific  
23  
24 context of Turkey, and this should be considered regarding applicability of findings. However,  
25  
26 the use of a transparent approach, credibility checks and emphasis on reflexivity throughout  
27  
28 the process allows for replicability of the methodology with different groups and contexts.  
29  
30 The context of mental health provision is likely to differ to other contexts where Syrian MHPs  
31  
32 are displaced such as in Lebanon, Jordan or particularly for those internally displaced in Syria,  
33  
34 and future research should shed light on this.  
35  
36  
37  
38  
39  
40  
41

42 This snapshot of Syrian MHPs suggestions a helpful model of training Syrians with a  
43  
44 mental health background to provide therapy to Syrians within the community as a way to  
45  
46 promotes understanding and empathy while reducing cultural and language barriers. It is also  
47  
48 a sustainable model of mental health care provision, in line with the UN's 2030 Agenda for  
49  
50 Sustainable Development and the Sustainable Development Goals [44,45]. Over time, Syrian  
51  
52 MHPs gain enough experience to become supervisors themselves, increasing access and  
53  
54 resources to mental health care within displaced, conflict-affected communities.  
55  
56  
57  
58

59 This model also creates the potential for emotional vulnerability in Syrian MHPs. It is  
60

1  
2  
3 important, then, to ensure adequate supervision where necessary, even if through online  
4 means, to enable MHPs to discuss difficult cases. Peer-support should be promoted and  
5 encouraged in the workplace within this community; this has been found to help prevent and  
6 manage secondary traumatic stress [46]. Personal therapy should also be made available  
7 within organisations. Given the stigma of accessing therapy within Syrian MHPs and the small  
8 and well-connected Syrian MHP community in Turkey, it would be helpful to introduce an  
9 Arabic speaking therapist (even if virtually), who is not a displaced Syrian MHP within this  
10 circle, to ensure confidentiality. Despite high caseloads and pressure given reduced resources,  
11 increased emphasis and awareness of self-care is important, including promoting a work-life  
12 balance.

13  
14  
15  
16  
17  
18  
19  
20  
21  
22  
23  
24  
25  
26  
27  
28 **Acknowledgements** We would like to thank the Syrian mental health professionals who  
29 dedicated their time and knowledge to make this research possible and we would like to  
30 acknowledge Trauma Aid UK facilitating this research.

31  
32  
33  
34  
35 **Contributors** AH, AW and KS designed and conceptualised the study. AH coordinated and  
36 carried out the data collection. AH analysed and interpreted the data. AH led manuscript  
37 writing with contributions from AW and KS.

38  
39  
40  
41  
42 **Funding** This research was supported by the UCL Doctorate in Clinical Psychology, funded by  
43 Camden & Islington NHS Foundation Trust. It was also support by a UCL Grand Challenges  
44 grant.

45  
46  
47  
48  
49 **Competing interests** None declared.

50  
51  
52 **Consent** All participants gave informed consent and all data was de-identified.

53  
54  
55 **Ethics approval** This study met the University College London Research Ethics Committee  
56 approved criteria (0163/001).

57  
58  
59 **Data sharing statement** Data are available from the corresponding author on reasonable  
60

request.

## Acknowledgements

**Contributors** AH, AW and KS designed and conceptualised the study. AH coordinated and carried out the data collection. AH analysed and interpreted the data. AH led manuscript writing with contributions from AW and KS. All authors reviewed the final manuscript.

**Funding** This research received no specific grant from any funding agency in the public, commercial or not-for-profit sectors.

**Competing interests** None declared.

**Consent** All participants gave informed consent and all data was de-identified.

**Ethics approval** This study met the University College London Research Ethics Committee approved criteria (0163/001).

**Data sharing statement** Data are available from the corresponding author on reasonable request.

## REFERENCES

- 1 Amnesty International. Syria: The worst humanitarian crisis of our time. Syria: Amnesty International, 2015.
- 2 United Nations Office for the Coordination of Humanitarian Affairs. 2018 *Humanitarian Needs Overview: Syrian Arab Republic*, 2017.
- 3 Physicians for Human Rights. Anatomy of crisis: a map of attacks in health care in Syria. <http://syriamap.phr.org/#/en> (accessed 9 March 2019)
- 4 Footer KH, Clouse E, Rayes D, et al. Qualitative accounts from Syrian health professionals regarding violations of the right to health, including the use of chemical weapons, in opposition-held Syria. *BMJ open*. 2018; 8:e021096.
- 5 Fouad FM, Sparrow A, Tarakji A, et al. Health workers and the weaponisation of health care in Syria: a preliminary inquiry for The Lancet–American University of Beirut Commission on Syria. *Lancet*, 2017;



- 1  
2  
3 390:2516-26.  
4  
5 6 World Health Organization. mhGAP Humanitarian Intervention Guide (mhGAP-HIG): Clinical  
6  
7 Management of Mental Neurological and Substance Use Conditions in Humanitarian Emergencies.  
8  
9 World Health Organization. 2015. [https://www.who.int/mental\\_health/publications/mhgap\\_hig/en/](https://www.who.int/mental_health/publications/mhgap_hig/en/)  
10  
11 (accessed 10 Apr 2019).  
12  
13 7 World Health Organization, United Nations High Commissioner for Refugees. Assessment and  
14  
15 Management of Conditions Specifically Related to Stress: mhGAP Intervention Guide Module. World  
16  
17 Health Organization. 2013.  
18  
19 [https://www.who.int/mental\\_health/emergencies/mhgap\\_module\\_management\\_stress/en/](https://www.who.int/mental_health/emergencies/mhgap_module_management_stress/en/)  
20  
21 (accessed 10 Apr 2019).  
22  
23 8 Inter-Agency Standing Committee. IASC guidelines on mental health and psychosocial support in  
24  
25 emergency settings. IASC. 2007.  
26  
27 [https://www.who.int/mental\\_health/emergencies/9781424334445/en/](https://www.who.int/mental_health/emergencies/9781424334445/en/) (accessed 10 Apr 2019).  
28  
29 9 El-Khani A, Cartwright K, Ang C, et al. Testing the feasibility of delivering and evaluating a child mental  
30  
31 health recovery program enhanced with additional parenting sessions for families displaced by the  
32  
33 Syrian conflict: A pilot study. *Peace Confl* 2018;24:188.  
34  
35 10 Almoshmosh N, Mobayed M, Aljendi M. Mental health and psychosocial needs of Syrian refugees and  
36  
37 the role of Syrian non-governmental organisations. *BJPsych Int* 2016;13:81-3.  
38  
39 11 Zaghrou-Hodali M. Humanitarian work using EMDR in Palestine and the Arab world. *J EMDR Practice*  
40  
41 *Research* 2014;8:248-51.  
42  
43 12 Baum N. Shared traumatic reality in communal disasters: Toward a conceptualization. *Psychotherapy*  
44  
45 *(Chic)* 2010;47:249.  
46  
47 13 Nuttman-Shwartz O, Dekel R. Training students for a shared traumatic reality. *Soc Work* 2008;53:279-  
48  
49 81.  
50  
51 14 Cohen K, Collens P. The impact of trauma work on trauma workers: A metasynthesis on vicarious  
52  
53 trauma and vicarious posttraumatic growth. *Psychol Trauma* 2013;5:570.  
54  
55 15 Nuttman-Shwartz O. Shared resilience in a traumatic reality: A new concept for trauma workers  
56  
57 exposed personally and professionally to collective disaster. *Trauma, Violence, & Abuse* 2015;16:466-  
58  
59 75.  
60

- 1  
2  
3 16 Harb C. The Arab region: cultures, values, and identities. In Handbook of Arab American psychology.  
4 Routledge; 2015.  
5  
6  
7 17 Hassan G, Ventevogel P, Jefee-Bahloul H, et al. Mental health and psychosocial wellbeing of Syrians  
8 affected by armed conflict. *Epidemiol Psychiatr Sci* 2016;25:129-41.  
9  
10  
11 18 Hill CE, Knox S. Self-disclosure. *Psychotherapy (Chic)* 2001;38(4):413.  
12  
13 19 Baum N. Secondary traumatization in mental health professionals: A systematic review of gender  
14 findings. *Trauma, Violence, & Abuse* 2016;17(2):221-35.  
15  
16  
17 20 Tosone C, Lee M, Bialkin L, et al. Shared trauma: Group reflections on the September 11th disaster.  
18 *Psychoanal. Soc. Work* 2003;10:57-77.  
19  
20  
21 21 Kirmayer LJ. Asklepiian dreams: The ethos of the wounded-healer in the clinical encounter. *Transcult*  
22 *Psychiatry* 2003;40:248-77.  
23  
24  
25 22 Miller GD, Baldwin DC. The implications of the wounded healer paradigm for the use of self in therapy.  
26 In Baldwin, M, eds. *The use of self in therapy* (2nd ed) New York: Haworth Press; 2000.  
27  
28  
29 23 Zerubavel N, Wright MO. The dilemma of the wounded healer. *Psychotherapy* 2012;49:482.  
30  
31  
32 24 Saakvitne KW. Shared trauma: The therapist's increased vulnerability. *Psychoanal dialogues* 2002  
33 17;12:443-9.  
34  
35  
36 25 Tosone C, Nuttman-Shwartz O, Stephens T. Shared trauma: When the professional is personal. *Clin Soc*  
37 *Work J* 2012 1;40:231-9.  
38  
39  
40 26 Saunders B, Sim J, Kingstone T, et al. Saturation in qualitative research: exploring its conceptualization  
41 and operationalization. *Qual Quant* 2018 1;52:1893-907.  
42  
43  
44 27 McLeod J. *Narrative and psychotherapy*. Sage; 1997.  
45  
46 28 Barker NC, Pistrang N, Elliott R. *Foundations of qualitative methods. Research methods in clinical*  
47 *psychology: An introduction for students and practitioners*. Wiley; 2002.  
48  
49  
50 29 White M, White MK, Wijaya M, et al. *Narrative means to therapeutic ends*. WW Norton & Company;  
51 1990.  
52  
53  
54 30 Elliott R, Fischer CT, Rennie DL. Evolving guidelines for publication of qualitative research studies in  
55 psychology and related fields. *Br J Clin Psychol* 1999;38:215-29.  
56  
57  
58 31 Braun V Clarke V. Using thematic analysis in psychology. *Qual Res Psychol* 2006;3:77-101.  
59  
60  
60 32 Satkunanayagam K, Tunariu A, Tribe R. A qualitative exploration of mental health professionals'

- 1  
2  
3 experience of working with survivors of trauma in Sri Lanka. *Int J Cult Ment Health* 2010;3:43-51.  
4  
5 33 Harrison RL, Westwood MJ. Preventing vicarious traumatization of mental health therapists: Identifying  
6 protective practices. *Psychotherapy (Chic)* 2009;46:203.  
7  
8  
9 34 Hunter SV, Schofield MJ. How counsellors cope with traumatized clients: Personal, professional and  
10 organizational strategies. *Int J Adv Couns* 2006;28:121.  
11  
12  
13 35 Lonergan BA, O'Halloran MS, Crane S. The Development of the Trauma Therapist: A Qualitative Study  
14 of the Child Therapist's Perspectives and Experiences. *Brief Treatment & Crisis Intervention* 2004;4.  
15  
16  
17 36 Gelso CJ, Hayes J. Countertransference and the therapist's inner experience: Perils and possibilities.  
18 Routledge; 2007.  
19  
20  
21 37 Sue S, Fujino DC, Hu LT, et al. Community mental health services for ethnic minority groups: a test of  
22 the cultural responsiveness hypothesis. *J Consult Clin Psychol* 1991;59:533.  
23  
24  
25 38 Sue DW, Sue D. Counseling the culturally different: Theory and practice. John Wiley & Sons Inc; 1999.  
26  
27  
28 39 Chang DF, Berk A. Making cross-racial therapy work: A phenomenological study of clients' experiences  
29 of cross-racial therapy *J Couns Psychol* 2009;56:521.  
30  
31  
32 40 Cardozo BL, Crawford CG, Eriksson C, et al. Psychological distress, depression, anxiety, and burnout  
33 among international humanitarian aid workers: a longitudinal study. *PloS One* 2012;7:e44948.  
34  
35  
36 41 Miller L. Our own medicine: Traumatized psychotherapists and the stresses of doing therapy.  
37 *Psychotherapy (Chic)* 1998;35:137.  
38  
39  
40 42 Aloud N, Rathur A. Factors affecting attitudes toward seeking and using formal mental health and  
41 psychological services among Arab Muslim populations. *J Muslim Ment Health* 2009;4:79-103.  
42  
43  
44 43 Pearlman LA, Saakvitne KW. Trauma and the therapist: Countertransference and vicarious  
45 traumatization in psychotherapy with incest survivors. WW Norton & Co; 1995.  
46  
47  
48 44 Nations U. *Transforming our world: The 2030 agenda for sustainable development*. New York: United  
49 Nations, Department of Economic and Social Affairs. 2015.  
50  
51  
52 45 Izutsu T, Tsutsumi A, Minas H, Thornicroft G, Patel V, Ito A. Mental health and wellbeing in the  
53 Sustainable Development Goals. *Lancet Psychiatry* 2015;2:1052-4.  
54  
55  
56 46 Rourke MT. Compassion fatigue in pediatric palliative care providers. *Pediatr Clin North Am*  
57 2007;54:631-44.  
58  
59  
60

# BMJ Open

## Qualitative accounts from Syrian mental health professionals: shared realities in the context of conflict and forced displacement

|                                 |                                                                                                                                                                        |
|---------------------------------|------------------------------------------------------------------------------------------------------------------------------------------------------------------------|
| Journal:                        | <i>BMJ Open</i>                                                                                                                                                        |
| Manuscript ID                   | bmjopen-2019-034291.R1                                                                                                                                                 |
| Article Type:                   | Original research                                                                                                                                                      |
| Date Submitted by the Author:   | 25-Feb-2020                                                                                                                                                            |
| Complete List of Authors:       | Hamid, Aseel; University College London<br>Scior, Katrina; University College London<br>Williams, Amanda; University College London                                    |
| <b>Primary Subject Heading</b>: | Mental health                                                                                                                                                          |
| Secondary Subject Heading:      | Global health, Qualitative research                                                                                                                                    |
| Keywords:                       | Quality in health care < HEALTH SERVICES ADMINISTRATION & MANAGEMENT, MEDICAL EDUCATION & TRAINING, MENTAL HEALTH, QUALITATIVE RESEARCH, Adult psychiatry < PSYCHIATRY |
|                                 |                                                                                                                                                                        |

SCHOLARONE™  
Manuscripts

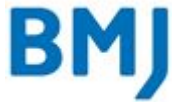

I, the Submitting Author has the right to grant and does grant on behalf of all authors of the Work (as defined in the below author licence), an exclusive licence and/or a non-exclusive licence for contributions from authors who are: i) UK Crown employees; ii) where BMJ has agreed a CC-BY licence shall apply, and/or iii) in accordance with the terms applicable for US Federal Government officers or employees acting as part of their official duties; on a worldwide, perpetual, irrevocable, royalty-free basis to BMJ Publishing Group Ltd ("BMJ") its licensees and where the relevant Journal is co-owned by BMJ to the co-owners of the Journal, to publish the Work in this journal and any other BMJ products and to exploit all rights, as set out in our [licence](#).

The Submitting Author accepts and understands that any supply made under these terms is made by BMJ to the Submitting Author unless you are acting as an employee on behalf of your employer or a postgraduate student of an affiliated institution which is paying any applicable article publishing charge ("APC") for Open Access articles. Where the Submitting Author wishes to make the Work available on an Open Access basis (and intends to pay the relevant APC), the terms of reuse of such Open Access shall be governed by a Creative Commons licence – details of these licences and which [Creative Commons](#) licence will apply to this Work are set out in our licence referred to above.

Other than as permitted in any relevant BMJ Author's Self Archiving Policies, I confirm this Work has not been accepted for publication elsewhere, is not being considered for publication elsewhere and does not duplicate material already published. I confirm all authors consent to publication of this Work and authorise the granting of this licence.

1  
2  
3  
4 **Qualitative accounts from Syrian mental health professionals: shared realities in the**  
5  
6  
7 **context of conflict and forced displacement**  
8  
9

10 Aseel Hamid<sup>1\*</sup>, Katrina Scior<sup>1</sup> and Amanda C de C Williams<sup>1</sup>  
11  
12

13  
14 <sup>1</sup>Research Department of Clinical, Educational and Health Psychology, University College London,  
15

16  
17 United Kingdom  
18

19  
20 \*Correspondence: [aseel.hamid@ucl.ac.uk](mailto:aseel.hamid@ucl.ac.uk)  
21  
22  
23  
24  
25  
26  
27  
28  
29  
30  
31  
32  
33  
34  
35  
36  
37  
38  
39  
40  
41  
42  
43  
44  
45  
46  
47  
48  
49  
50  
51  
52  
53  
54  
55  
56  
57  
58  
59  
60

## ABSTRACT

**Objectives.** To explore the impact of the provision of care of forcibly displaced Syrian mental health professionals to Syrian clients in the community given shared experiences and backgrounds with clients. **Design.** A qualitative study using thematic analysis of in-depth semi-structured interviews to explore shared realities, self-disclosure and the impact of providing therapy. **Setting.** Syrian mental health professionals operating in Gaziantep and Istanbul, Turkey were interviewed. **Participants.** Sixteen forcibly displaced Syrian mental health professionals (8 male, 8 female) aged between 24 and 54 years ( $M = 35$  years,  $SD = 8.3$  years) who provided care to the displaced Syrian community in Turkey. **Results.** All workers described having a shared reality with their clients as helpful in therapy and a smaller proportion described it as a vulnerability. All described their work with Syrian clients as fulfilling and most described it as distressing. Participants referred to self-care, supervision, peer-support and personal therapy as a means to cope. **Conclusions.** This study provides the first insight into the shared experiences of the ongoing trauma, loss and violations resulting from the ongoing Syrian conflict from the perspective of Syrian

1  
2  
3 mental health professionals, adding to the literature of the professional issues and  
4  
5  
6  
7 ethical duty to protect health workers in conflict settings.  
8  
9

### 10 **Strengths and limitations of this study**

- 14 • This study uniquely explores the experiences of forcibly displaced Syrian  
15  
16  
17 mental health workers and the shared reality of Syrian mental health workers  
18  
19  
20  
21 and their Syrian clients.  
22
- 24 • Interviews were of a sample of forcibly displaced Syrian mental health workers  
25  
26  
27 based in Turkey conducted in their native language, Arabic.  
28
- 31 • The emerging themes showed both positive and negative impacts on Syrian  
32  
33  
34 mental health workers, with implications for the ethical duty to protect Syrian  
35  
36  
37 mental health workers through the provision adequate support in conflict and  
38  
39  
40  
41  
42 post-conflict settings.  
43  
44

### 45 **BACKGROUND**

46  
47  
48 The ongoing Syrian conflict, seen as the worst humanitarian crisis of our time [1], has  
49  
50  
51  
52 led to the displacement of half of Syria's population with over 13.1 million Syrians in  
53  
54  
55  
56 need of humanitarian assistance leading to an ongoing public health crisis [2]. The  
57  
58  
59 Syrian healthcare community has been a target of the military strategy led by the  
60



1  
2  
3  
4 Syrian government with reports of 478 attacks on medical facilities with 830 medical  
5  
6  
7 personnel killed since the beginning of the conflict [3] and ongoing systematic  
8  
9  
10 violations of international humanitarian law, including the use of missiles, sniper and  
11  
12  
13 chemical attacks on hospitals and ambulances and the torture of health care workers  
14  
15  
16 [4,5]. The majority of published literature sheds light on the impact of medical  
17  
18  
19 personnel, yet to our knowledge no literature exists on the impact of the conflict on  
20  
21  
22  
23  
24  
25 mental health workers.

26  
27  
28 Widely endorsed global mental health programmes and guidelines emphasise  
29  
30  
31 the importance of working with communities and influential community figures, and  
32  
33  
34 where specialist support is required, guidelines recommend training local community  
35  
36  
37 workers in evidence-based trauma therapies such as eye movement desensitisation  
38  
39  
40 and reprocessing (EMDR) and trauma-focussed cognitive behavioural therapy [6-8].  
41  
42  
43  
44  
45 Consequently expatriate Syrian mental health professionals (MHPs), various Syrian  
46  
47  
48 non-governmental organisations (NGOs) and international NGOs (INGOs) have made  
49  
50  
51 initiatives to provide training and supervision for evidence-based therapies to  
52  
53  
54 displaced Syrians [9-11]. While doing so mobilises resources, reduces language  
55  
56  
57 barriers and enhances cultural sensitivity, it also comes with challenges including high  
58  
59  
60

1  
2  
3 caseloads with reduced opportunities for supervision given the lack of qualified  
4  
5  
6  
7 supervisors relative to demand, with potential negative emotional consequences.  
8  
9

10 The term 'shared traumatic reality' refers to situations where both professional  
11  
12 and client have been exposed to the same communal disaster, and 'double exposure'  
13  
14 refers to health professionals' exposure both as professionals providing a service and  
15  
16 as members of the community [12,13]. Most studies of a shared traumatic reality are  
17  
18 based on quantitative enquiry. A qualitative meta-synthesis of studies of the impact of  
19  
20 trauma work on trauma workers found themes related to emotional and somatic  
21  
22 reactions to trauma work such as sadness, helplessness, nausea and despair,  
23  
24 changes to schemas and behaviours such as questioning themselves and their lives  
25  
26 and perceiving the world as unsafe [14]. While much research focuses on the potential  
27  
28 negative consequences, recent research is acknowledging the potential for shared  
29  
30 resilience in a traumatic reality [15].  
31  
32  
33  
34  
35  
36  
37  
38  
39  
40  
41  
42  
43  
44  
45  
46  
47

48 Very little literature exists on Syrian MHPs warranting in-depth exploration to  
49  
50 understand their context and experience. Despite intra- and inter-variations within  
51  
52 Arab cultures, the influence of Syrian culture contributes to differential  
53  
54 conceptualisations, processes and experiences such as kissing and hugging  
55  
56  
57  
58  
59  
60

1  
2  
3  
4 strangers in same-sex greetings, asking about family and offering food or drink given  
5  
6  
7 the deep-rooted values of family and hospitality in Arab culture [16,17] likely  
8  
9  
10 influencing the MHP-client dyad. Given these Syrian-Arab cultural frameworks and the  
11  
12  
13 shared ongoing trauma reality of Syrian MHPs and clients, it is unclear what this reality  
14  
15  
16  
17 looks like and it how differs (or not) from a context of Western mental health care.  
18  
19  
20

21         In a typical Western therapeutic context, self-disclosure is used cautiously,  
22  
23  
24 occurs infrequently and often relates to MHPs' professional background rather than  
25  
26  
27 personal details [18]. Disasters, regardless of geographical location, often create  
28  
29  
30 boundary ambiguity between the personal and professional with the penetration of  
31  
32  
33 demands from neighbours, friends and acquaintances which can lead to burnout and  
34  
35  
36 strong countertransference arousal responses [19]. A shared traumatic reality creates  
37  
38  
39 a feeling of universality leading to increased MHP self-disclosure [20]. Appropriate  
40  
41  
42 self-disclosure allows the MHP, as the "wounded healer" [21], to show their  
43  
44  
45 resourcefulness and to instil hope in clients of healing and recovery [22,23]; at the  
46  
47  
48 same time, increased self-disclosure within a shared reality can increase MHPs'  
49  
50  
51 vulnerability for distress [24,25].  
52  
53  
54  
55  
56  
57  
58  
59  
60

1  
2  
3  
4 It is unclear how or whether MHPs' self-disclosure, in any capacity, features  
5  
6  
7 within these therapeutic dyads. It is expected that a shared reality in the context of  
8  
9  
10 Syrian culture may lend itself to MHPs' self-disclosure, particularly within Turkey where  
11  
12  
13 Syrians are living within a small city, and that there are very few MHPs relative to  
14  
15  
16 residents. Many Syrian MHPs are themselves forcibly displaced, have witnessed and  
17  
18  
19 experienced traumatic events and, given the ongoing nature of the conflict, have an  
20  
21  
22 ongoing sense of hopelessness and loss. The term 'forcibly displaced' is used  
23  
24  
25 throughout this paper to capture those who are seeking asylum as well as refugees.  
26  
27  
28  
29  
30  
31 The Syrian MHP-client dyad creates a shared reality that, to the researchers'  
32  
33  
34 knowledge, has not been explored. An investigation of this context is warranted, along  
35  
36  
37 with what allows Syrian MHPs to continue to function in their capacity as healers, and  
38  
39  
40 what coping consists of within a displaced Syrian context.  
41  
42  
43  
44

45 This research aims to generate knowledge carved directly from Syrian MHPs  
46  
47  
48 trained to provide different evidence-based therapies through communicating with  
49  
50  
51 them in their native Arabic language to explore their experience of providing therapy  
52  
53  
54 within a shared Syrian culture and displacement context.  
55  
56  
57

## 58 59 **METHODS** 60

1  
2  
3  
4 Semi-structured interviews were conducted in Arabic by the first author (AH) with  
5  
6  
7 forcibly displaced Syrian MHPs across two cities in Turkey, Istanbul and Gaziantep,  
8  
9  
10 the latter being a city 97 km north of Aleppo, Syria, in August and November 2017.  
11  
12  
13  
14 Turkey is home to the largest number of Syrian refugees and the majority live along  
15  
16  
17 the southern border, with around half a million Syrians living in Gaziantep, a city used  
18  
19  
20 as a hub for cross-border support, hosting Syrian and INGOs. Trauma Aid UK, an  
21  
22  
23 INGO who provide specialist trauma training for Syrian health professionals in Turkey  
24  
25  
26  
27  
28 facilitated the recruitment of participants.  
29  
30

31  
32 The interviewer, AH, is a female Iraqi British MHP with clinical experience of  
33  
34  
35 mental health and conflict, conducting research as part of her doctoral thesis. It is  
36  
37  
38 likely that her characteristics have influenced all levels of the research cycle.  
39  
40

41  
42 Through reflexivity AH used her clinical experience and cultural background to place  
43  
44  
45 herself in a unique position to carry out this research using experiential knowledge to  
46  
47  
48 enhance understanding. Participants were open to discussion during interviews and  
49  
50  
51 all expressed keenness to participate given the potential for this research to help  
52  
53  
54  
55  
56 others.  
57  
58  
59  
60

1  
2  
3  
4 The study aimed to (1) investigate the nature and influence of the shared  
5  
6  
7 culture and experiences of forced displacement within the Syrian MHP-client dyad  
8  
9  
10 (2) explore the nature and impact of MHPs' disclosure of shared experiences and (3)  
11  
12  
13 examine the impact of providing therapy on MHPs and the associated means of  
14  
15  
16 coping. Reporting adheres to the standards for reporting qualitative research  
17  
18  
19 (SRQR) recommendations [26].  
20  
21  
22

## 23 24 **Participants**

25  
26  
27 Eligible participants were a purposive sample of forcibly displaced Syrian MHPs  
28  
29  
30 residing in Turkey working with Syrian clients. Participants were recruited through  
31  
32  
33 Trauma Aid UK's mailing list and word of mouth. All participants were given information  
34  
35  
36 sheets and consent forms (in Arabic) and were told prior to interview that participation  
37  
38  
39 was entirely voluntary. Permission for audio recording was sought and granted.  
40  
41  
42  
43 Interviews were recorded using the Olympus DS-3500 recorder which protects against  
44  
45  
46 unintended access by a 128-bit real-time file encryption. Participants were aware that  
47  
48  
49 all information they provided would be encrypted and stored securely and that all  
50  
51  
52 information would be anonymised through the use of identification codes. Interviews  
53  
54  
55  
56 were conducted either in Gaziantep ( $n = 11$ ), Istanbul ( $n = 3$ ) or via Skype ( $n = 2$ ) and  
57  
58  
59  
60

1  
2  
3 lasted between 40 and 70 minutes. The sample size was determined by data  
4  
5  
6  
7 saturation; the degree to which new data repeated what was expressed in previous  
8  
9  
10 data [27]. The participants consisted of 16 forcibly displaced Syrian MHPs residing in  
11  
12  
13 Turkey aged between 24 and 54 years ( $M = 35$ ,  $SD = 8.3$ ), 8 males and 8 females, 12  
14  
15  
16  
17 psychologists and 4 psychiatrists.  
18  
19

## 20 21 **Measurement and analysis**

22  
23  
24 The interview schedule was guided by the research questions and structured in a way  
25  
26  
27 to encourage participants to tell their story using three basic narrative structures; a  
28  
29  
30 beginning (such as 'In what way do you experience similarities between you and your  
31  
32  
33 clients?'), in which the setting was described, a middle which contains a series of  
34  
35  
36 obstacles and attempted solutions (e.g. 'Do you talk with your clients about your own  
37  
38  
39 experiences?') and an ending or resolution (for example 'What resources do you draw  
40  
41  
42 on that help with the challenging aspects of doing therapy?') [28]. Given that little is  
43  
44  
45 known in the literature about this sample, open-ended, exploratory questions were  
46  
47  
48 used [29] as well as externalising questions derived from a narrative approach to  
49  
50  
51 encourage participants to feel more comfortable to have an open dialogue [30]. The  
52  
53  
54  
55  
56  
57  
58  
59 research aimed to be grounded in examples and these were elicited where relevant  
60

1  
2  
3 [31]. There were no changes made to the interview schedule over the course of the  
4  
5  
6  
7 research.  
8  
9

10 A thematic analysis was conducted by AH using an inductive approach  
11  
12 following the six steps recommended by Braun and Clarke [32] using NVivo 11  
13  
14 software. AH and two bilingual British Syrian health professionals transcribed the  
15  
16 interview from Arabic audio to English script and each script was read and reread and  
17  
18 systematically coded, giving full and equal attention to each item. A peer researcher  
19  
20 independently coded a randomly chosen transcript using the same procedure outlined  
21  
22 above, and any discrepancies were resolved through discussion. AH used mind maps  
23  
24 to construct a thematic structure while being mindful of personal biases and influences.  
25  
26 These themes were reviewed with the research team (KS, AW) to discuss whether  
27  
28 this was an accurate depiction; consequently, themes were renamed and reorganised.  
29  
30  
31  
32  
33  
34  
35  
36  
37  
38  
39  
40  
41  
42  
43  
44  
45 Data analysis took place between December 2017 and April 2018.  
46  
47  
48

### 49 **Patient and public involvement**

50  
51  
52 No patients or members of the public were involved in the conduct of this research.  
53  
54

## 55 **RESULTS**

### 56 57 58 59 **Situating the context** 60



1  
2  
3  
4 Prior to presenting the main themes emerging from the interviews, the context in which  
5  
6  
7 the Syrian MHPs described working is presented here. Syrian MHPs spoke of a  
8  
9  
10 number of facilitators to mental health provision. All participants referred to a number  
11  
12  
13 of specific psychological tools such as receiving psychological therapy training  
14  
15  
16 sessions as well as non-specific tools such as adopting an empathic, non-judgmental  
17  
18  
19 stance. Flexible ways of working through Skype or Whatsapp and providing therapy in  
20  
21  
22 people's homes also facilitated therapy. Participants spoke of the importance of  
23  
24  
25 psychosocial support including the use of psychological first aid and linking clients to  
26  
27  
28 activities and social centres.  
29  
30  
31  
32  
33

34  
35 "The main thing is to provide people with their main needs, not only food  
36  
37  
38 and water but also their human rights. We tried to change the mentality  
39  
40  
41 of the psychologists and the psychological workers to be able to support  
42  
43  
44 the people affected by the crisis." (P5)  
45  
46  
47  
48

49 There were also a number of barriers. Participants reported feeling under  
50  
51  
52 pressure due to high workloads and consequently only being able to provide a limited  
53  
54  
55 number of sessions. Participants stated that clients were reluctant to talk about their  
56  
57  
58 mental health problems and traumatic experiences, especially sexual abuse, with a  
59  
60

1  
2  
3  
4 general stigma present within the Syrian community accompanied by a lack of  
5  
6  
7 awareness of psychology.  
8  
9

10 "They always say: 'Am I a crazy person?' I face this word 'crazy' a lot."  
11  
12

13  
14 (P1)  
15  
16

17 Some expressed the need for more trained therapists, risk management staff  
18  
19 and sensitive interpreters. Financial difficulties were described both as a barrier to the  
20  
21 provision of adequate mental health care and training and to patients accessing  
22  
23 services due to not being able to travel to sessions.  
24  
25  
26  
27  
28  
29

### 30 31 **Main Themes** 32

33  
34 Analysis led to two overarching themes of shared characteristics and personal impact,  
35  
36 with six themes and ten sub-themes; Figure 1 illustrates these themes.  
37  
38  
39

40  
41  
42 *<Insert Figure 1 about here>*  
43  
44

#### 45 *Shared reality* 46

#### 47 48 Empathising with experiences 49

50  
51  
52 Syrian MHPs lived through war and were forcibly displaced themselves and directly  
53  
54 and indirectly experienced traumatic events. This enabled them to empathise with  
55  
56  
57  
58  
59  
60

1  
2  
3 clients' experience. All referred to this as an asset creating better understanding and  
4  
5  
6  
7 trust within therapy.  
8  
9

10 "...they have family who has been detained and I have family who is  
11  
12  
13  
14 detained. Some have family who they have not seen for a long time and  
15  
16  
17 I too have not seen my family for a long time, because of the war...It lets  
18  
19  
20  
21 you be more empathic, sometimes you be may be able to relieve him  
22  
23  
24 more...it makes you have more motivation, it makes you feel how much  
25  
26  
27  
28 he is literally suffering." (P3)  
29  
30

31 A smaller proportion of MHPs gave examples of how sharing a traumatic reality  
32  
33  
34 led to unpleasant reminders, some preferring not to go into too much detail to avoid  
35  
36  
37  
38 over-identification and emotional harm.  
39  
40

41  
42 "...a male patient, he was in prison and was subject to a lot of torture...I  
43  
44  
45 always heard about these things but I never thought I will see it in reality.  
46  
47  
48  
49 It was hard for me because afterwards I thought that my brother [who  
50  
51  
52 was imprisoned and possibly killed in Syria] might have gone through  
53  
54  
55  
56 the same things" (P1)  
57  
58

59 "I do not go into a lot of details with [the client] about the problem, so as  
60

1  
2  
3 not to empathise to the extent that I feel that our problem is one" (P16)  
4  
5  
6

7 Understanding language and culture  
8  
9

10 As well as having shared experiences, Syrian MHPs shared the language and culture  
11  
12 of their clients. MHPs commented on how their nuanced understanding of Syrian  
13  
14 dialects allows them to link a clients' dialect to their cultural, religious, political and  
15  
16 social contexts. Their understanding of cultural and religious norms and practices such  
17  
18 as the male-female relationship in relation to disclosing emotional experiences,  
19  
20 physical touch and using words of comfort appropriately according to a clients' spiritual  
21  
22 context was a useful tool.  
23  
24  
25  
26  
27  
28  
29  
30  
31  
32  
33  
34

35 "We tried in our work to have females treat males but it did not work. This  
36  
37 is in our culture, it is shameful for males to talk about his problems with  
38  
39 females and this is why males prefer to talk with male doctor. So we  
40  
41 started to refer males to males and females to us [females]."(P1)  
42  
43  
44  
45  
46  
47  
48

49 "So if [a client] says my son became a martyr, you don't just say 'oh ok'  
50  
51 and write it down and then what... you make them feel that you heard  
52  
53 them...and say oh Allah rest his soul, and Allah willing he's now in  
54  
55 heaven and may his martyrdom be a reason for your redemption" (P3)  
56  
57  
58  
59  
60

1  
2  
3 Self-disclosure  
4  
5  
6

7 The majority of Syrian MHPs used self-disclosure as a tool in therapy with varied uses;  
8  
9  
10 to help clients see the MHP as an example of having overcome difficulties given their  
11  
12  
13 shared experience, or for political purposes to build the clients' trust given the tensions  
14  
15  
16 and conflicts within in Syria, particularly if clients come from different areas. One MHP  
17  
18  
19  
20  
21 noted that:  
22  
23

24 "...[most of my clients] are originally from rural Aleppo and they speak in  
25  
26  
27 a different accent as I come from Douma...Patients ask me where I am  
28  
29  
30 from. This question could come from the fear inside them that I have  
31  
32  
33 different political views or I might report them to the Syrian regime. In  
34  
35  
36 this case, I tell them that I am from Douma which they know that it has  
37  
38  
39 gone through the same experience as rural Aleppo." (P14)  
40  
41  
42  
43  
44  
45  
46  
47  
48

49 All MHPs gave disclaimers regarding self-disclosure, either relating to  
50  
51  
52 professional boundaries, their psychological approach or their social context. MHPs  
53  
54  
55 were more likely to use disclosure to reduce perceived power imbalances:  
56  
57  
58

59 "...when he comes to see a therapist or doctor, he thinks that the  
60

1  
2  
3 therapist/doctor comes from another planet and doesn't know the  
4  
5  
6  
7 struggle that he goes through. So we talk about general issues like  
8  
9  
10 there's a lot of traffic, public transport is expensive., rent is going up for  
11  
12  
13  
14 us as Syrians, living in Turkey is expensive ...he feels that you've  
15  
16  
17 experienced the same struggle..." (P3)  
18  
19  
20

21 MHPs spoke about the importance of the use of professional boundaries as a  
22  
23  
24 way to protect the client, themselves and the relationship using contracts, fixed hours  
25  
26  
27 of contact and placing responsibility onto clients.  
28  
29  
30

31 "Sometimes the relationship becomes unprofessional when I start to use  
32  
33  
34 the phone to call them and see how they are doing. When [I feel this] ...  
35  
36  
37 I reduce the number of sessions and give her the responsibility to make  
38  
39  
40 her...life choices." (P10)  
41  
42  
43  
44

45 "This is what made a difference - listening to stories made me stronger  
46  
47  
48 and now I was able to override this feeling [of being overwhelmed by  
49  
50  
51 traumatic stories] and have immunity and I put a separation between me  
52  
53  
54 and the client so that I don't get affected." (P16)  
55  
56  
57  
58

59 *Personal impact of therapy*  
60

## Fulfilment

All MHPs spoke about how knowing that they have helped and relieved their clients was rewarding, and for some, this acted as a main motivator to help overcome the emotional difficulties of this work:

“...the thing that protects me is to complete therapy [with a client] and see the improvement and change that happened. The person who came completely destroyed and began to love life... when you see the change...this is the biggest thing that pushes me through difficulties”

(P16)

MHPs spoke about how their clients taught them things that enabled them to grow emotionally and that listening to difficult and traumatic stories over the years helped to make them more immune to distress as MHPs:

“I used to tell my teacher I do not think I can treat people in the future because I lost my brother... she told me you will be able to do it because you are Syrian and you know Arabic and you will be a role model for those people who you will meet. Now [with time] I think this true because when I see Syrians who are struggling I can feel what they are going

1  
2  
3  
4  
5  
6  
7  
8  
9  
10  
11  
12  
13  
14  
15  
16  
17  
18  
19  
20  
21  
22  
23  
24  
25  
26  
27  
28  
29  
30  
31  
32  
33  
34  
35  
36  
37  
38  
39  
40  
41  
42  
43  
44  
45  
46  
47  
48  
49  
50  
51  
52  
53  
54  
55  
56  
57  
58  
59  
60

though. Jalaluddin Rumi said that the wound in your heart is the place where light enters you.” (P1)

Most of the Syrian MHPs identified as Muslim and most also spoke about gaining spiritual satisfaction from helping others, with some saying that they felt their purpose was to be brought from the war to help others who are affected, and others saying they feel satisfied that God will reward them for their work.

### Distress

As well as the fulfilling aspects of therapy, MHPs also spoke about the personal negative impact of clients’ traumatic stories, describing experiencing secondary traumatic stress and burnout:

“At the beginning of my experience I was by myself with a lot of trauma cases I felt that I was burnt out...and that I was trapped. I was not happy, I started having nightmares because I was exposed to very big issues such as incest, physical and sexual assaults, losing body parts and suicide” (P1)

“The other day I was working at the orphanage and I saw 11 people in one day...this is a big number and causes pressure, mental exhaustion



1  
2  
3 and burnout. Sometimes you're tired and you need to take a day  
4  
5  
6  
7 off...your capacity becomes less...and this is...we all...this is burnout.”  
8  
9

10 (P3)

11  
12  
13  
14 “To be honest, sometimes at the end of the day I feel that I am unable to  
15  
16  
17 speak anymore, around 5.30 when we finish our work” (P4)  
18  
19

20  
21 MHPs also mentioned feeling shocked by the traumatic experiences that their clients  
22  
23  
24 endured. This shock often came with MHPs empathising and bearing witness to the  
25  
26  
27 reality that individuals experienced such atrocities, rather than seeing them as abstract  
28  
29  
30 events spoken about or reported in media outlets.  
31  
32

33  
34  
35 “These were things...I only heard about and did not expect that it existed  
36  
37  
38 in reality and that I will see it in the real world.” (P1)  
39  
40  
41

42 “I was shocked by what [the children] went through...” (P10)  
43  
44

45  
46 “I used to think it's unbelievable all this pain happened to us, I can't  
47  
48  
49 believe to this extent; really is it possible that this shelling happened,  
50  
51  
52 these things happened inside prisons?” (P16)  
53  
54  
55

56  
57 Ways of coping  
58  
59  
60

1  
2  
3  
4 All Syrian MHPs had their individual ways of coping with the emotional impact of  
5  
6  
7 therapy. All spoke about the importance of seeking support and increasing their  
8  
9  
10 knowledge through supervision, resources or peer support:  
11  
12

13  
14 “Peer support is also important, your colleagues around you, it is not the  
15  
16  
17 same as supervision, but it helps.” (P8)  
18

19  
20  
21 “You need to work with the skills and the responsibilities that you have,  
22  
23  
24 rather than trying to do things you’re not qualified for...[K]eeping up with  
25  
26  
27 literature, Cochrane reviews and so on...I try to keep up to date.” (P9)  
28  
29

30  
31 MHPs also spoke about the importance of having support through friends or  
32  
33  
34 family to talk about their own difficulties:  
35  
36

37  
38 “Sometimes when I have problems in my life or with my son, it is hard to  
39  
40  
41 always listen to all people, sometimes it is a very simple thing but you  
42  
43  
44 feel you need someone to ask about you....you just need to talk to  
45  
46  
47 someone.” (P4)  
48  
49  
50

51  
52 Six participants spoke about using personal therapy to cope with difficulties so  
53  
54  
55 that they can provide better care to their clients, despite this being stigmatised within  
56  
57  
58 the community and that this was often not spoken about:  
59  
60

1  
2  
3  
4       Personal therapy is useful. First, it allows me to put myself in my  
5  
6  
7       patients' position, this makes me feel humble. Second, it gives me the  
8  
9  
10       chance to explore the perspectives of other therapists and how they see  
11  
12  
13  
14       things. Third, when there is an issue that is overwhelming, personal  
15  
16  
17       therapy gives me the space to speak out about it". (PA)

18  
19  
20  
21       "On the social level, people still have stigma about psychology...we  
22  
23  
24       don't tell each other that we need help but we still go and seek the help.  
25  
26  
27  
28       We still have the stigma about psychology treatment." (PA)

29  
30  
31       All participants spoke about self-care, often as spending time either with loved  
32  
33  
34       ones or alone without thinking or speaking about work and being around nature:

35  
36  
37  
38       "Gaziantep has a lot of big and beautiful gardens where we go and spend  
39  
40  
41       time, sometimes we meet friends, but also sometimes you feel you just  
42  
43  
44       want to be on your own." (P4)

45  
46  
47  
48       "My wife has started to follow my cases and understand my work. She  
49  
50  
51       says to me 'where is the self-care?! You train on self-care but we want  
52  
53  
54       you to do self-care with us!' [laughter] she's like 'Let's go to the ocean  
55  
56  
57       this year', so we will go with the kids." (P9)

## DISCUSSION

To our knowledge, this is the first study to shed light on the experiences of forcibly displaced Syrian MHPs providing services to Syrians affected by conflict. This was a qualitative exploration of challenges faced by Syrian MHPs amongst the shortages of mental health provision, high caseloads and emotional vulnerability in light of shared traumatic experiences with clients, while illuminating the satisfaction gained from providing therapy using multiple means of coping. The shared reality of practitioner and client enhances empathy and understanding and overcomes language and cultural barriers often present in these settings where there is a gap between the demand and supply of mental health services.

Published literature, particularly using quantitative methodology, tends to conceptualise positive and negative impacts of therapy provision as separate and mutually exclusive entities. However, a qualitative exploration of Sri Lankan MHPs working with Sri Lankan survivors of trauma described “an accumulated negative emotional impact but also to simultaneously contain positive, growth-promoting and personally satisfying aspects” [33]. Another qualitative study of trauma therapists showed the positive changes co-occurred alongside negative emotional impacts [34].

1  
2  
3  
4 These mirror this study's findings, where fulfilment and distress emerged as parallel  
5  
6  
7 themes relating to the overarching theme of the personal impact of therapy. There is  
8  
9  
10 a need to further investigate the coexistence and interaction of the positive and  
11  
12  
13  
14 negative impacts of therapy provision, particularly where there is a shared reality.  
15  
16

17 The concept of a shared resilience in a traumatic reality goes some way in  
18  
19  
20 understanding this, yet this concept has not been addressed sufficiently [15].  
21  
22

23  
24 Syrian MHPs spoke about the shock of the human rights abuses inflicted on  
25  
26  
27 their clients by the Syrian government, including torture and sexual abuse, particularly  
28  
29  
30 early on in their working lives. This fits with broader qualitative research capturing  
31  
32  
33 shock as a theme experienced by counsellors in Sydney working in child protection  
34  
35  
36 services [35] and child trauma therapists in America [36]. Similarly, time and  
37  
38  
39 experience were key moderators of the negative emotional impact in both studies;  
40  
41  
42 more time and experience led to less distress and overwhelming emotions.  
43  
44  
45  
46  
47

48  
49 Previous research suggests that MHPs' own difficult experiences may facilitate  
50  
51  
52 empathic connection with clients and use countertransference positively in therapy  
53  
54  
55 [37]. The shared reality of all Syrian MHPs facilitated empathy, enhancing their sense  
56  
57  
58 of compassion satisfaction and bonding, allowing them to feel more competent in  
59  
60

1  
2  
3 helping their clients [20]. This shared reality also enabled greater understanding of  
4  
5  
6 cultural nuances and language; an important strength given the lack of available  
7  
8  
9 sensitively trained interpreters and that matching MHPs to clients based on language  
10  
11  
12 similarities has been shown to predict better therapy outcomes [38].  
13  
14  
15

16  
17 In some cases, clients' war-related traumatic experiences reminded Syrian  
18  
19  
20 MHPs of their own experiences and some MHPs noted not going into too much detail  
21  
22  
23 about the clients' distressing experiences to avoid over-identification. It is unclear  
24  
25  
26 whether or how this may affect the therapy process, particularly when processing or  
27  
28  
29 reliving trauma, as theoretical underpinnings of both EMDR and trauma focussed  
30  
31  
32 cognitive behavioural therapy require clients to bring to mind and/or verbalise  
33  
34  
35 necessary detail. Shared realities led to challenges that this data may not have  
36  
37  
38 captured. Literature on ethnic minority therapists working with ethnic minority clients  
39  
40  
41  
42 reveals challenges including therapist over-identification leading to assumptions and  
43  
44  
45 potential clashes in cultural values [39], the latter also likely challenges for Syrian  
46  
47  
48 MHPs working with Syrians residing in a Turkish majority country.  
49  
50  
51

52  
53 Syrian MHPs in this study used self-disclosure cautiously while maintaining  
54  
55  
56 professional boundaries, despite theory on shared trauma in a traumatic reality  
57  
58  
59  
60

1  
2  
3 predicting greater self-disclosure, blurred boundaries and burnout [12]. It is possible  
4  
5  
6  
7 that adherence to professional boundaries, encouraged by training sessions that many  
8  
9  
10 Syrian MHPs received, contributed to protecting participants from the experience of  
11  
12  
13 burnout. Syrian MHPs in similar social and financial situations to their clients reported  
14  
15  
16 using disclosure as a way to gain common ground, in contrast to more privileged MHPs  
17  
18  
19 actively not disclosing. Previous research with cross-cultural dyads showed that  
20  
21  
22 therapist self-disclosure was only perceived as helpful when used as an “effective  
23  
24  
25 strategy for bridging perceived social and power distance” [40].  
26  
27  
28  
29  
30

31  
32 Longitudinal research with INGO workers showed that social support was  
33  
34 associated with lower levels of depression, burnout, lack of personal accomplishment  
35  
36 and greater life satisfaction [41]; self-care amongst Syrian MHPs was often located in  
37  
38 the context of social support. MHPs need to have insight into their feelings and the  
39  
40 ability to differentiate between the needs of the self and of the client [42]. A number of  
41  
42  
43 Syrian MHPs described personal therapy as a helpful means to do this and as a way  
44  
45  
46 to cope with emotional distress despite a stigma surrounding this. MHPs experience  
47  
48  
49 barriers to disclosure of undertaking personal therapy with negative consequences  
50  
51  
52 such as being seen as incompetent [23]. Syrian MHPs seeking personal therapy are  
53  
54  
55  
56  
57  
58  
59  
60

1  
2  
3 likely to experience double stigma given that mental health problems have been  
4  
5  
6  
7 described amongst the Syrian community in this research as highly stigmatised, as  
8  
9  
10 well as within Arab communities overall [43].  
11  
12  
13

14 Syrian MHPs collectively experience the ongoing Syrian conflict on a daily basis  
15  
16  
17 through media outlets, while hearing first-hand accounts from clients, family and  
18  
19  
20 friends about the ongoing human rights violations committed in the context of the  
21  
22  
23 failure of the international community and law. This may damage their sense of hope,  
24  
25  
26 connection and faith in humanity. Maintaining optimism and hopefulness are essential  
27  
28  
29 aspects of being an effective trauma therapist [44]. A number of Syrian MHPs' strong  
30  
31  
32 sense of faith in God and their purpose was a way to make sense of incomprehensible  
33  
34  
35 violations and to maintain hope. Spirituality also brought a sense of satisfaction to a  
36  
37  
38 number of participants and Syrian MHPs saw their work as a good deed towards a  
39  
40  
41 wider struggle and a wider cause.  
42  
43  
44  
45  
46  
47  
48

49 The findings are subject to some limitations. Given that a large part of  
50  
51  
52 recruitment was through Trauma Aid's channels, there may have been an unspoken  
53  
54  
55 message that the nature of their involvement would be linked to Trauma Aid, despite  
56  
57  
58 emphasis on the voluntary nature of their involvement and the separation of the  
59  
60



1  
2  
3 interviewer and this research. Although a number of participants did discuss the  
4  
5  
6  
7 challenges they faced, boundary violations and personal disclosure, this may have  
8  
9  
10 created more of a reluctance in openly discussing such topics. Furthermore, the  
11  
12  
13 information sheet and content of interviews may have led those who are struggling to  
14  
15  
16  
17 understandably opt out, therefore creating a less representative sample and greater  
18  
19  
20 impression of coping. This research is a result of the interaction of a small research  
21  
22  
23 team, including a bilingual interviewer, with a specific group of displaced Syrian MHPs  
24  
25  
26  
27 in the specific context of Turkey, and this should be considered regarding applicability  
28  
29  
30 of findings. However, the use of a transparent approach, credibility checks and  
31  
32  
33 emphasis on reflexivity throughout the process allows for replicability of the  
34  
35  
36  
37 methodology with different groups and contexts. It would be worthwhile to extend this  
38  
39  
40  
41 research to other contexts where Syrians are forcibly displaced, such as in Jordan,  
42  
43  
44  
45 Lebanon, Germany and within Syria. Mental health provision is likely to differ in each  
46  
47  
48  
49 of these contexts given the differences in the numbers of forcibly displaced Syrians,  
50  
51  
52  
53 the majority language and culture of the country, the socio-political context and the  
54  
55  
56 available resources; further research could shed light on this.

57  
58  
59 The findings from this snapshot of Syrian MHPs may suggest that training local  
60

1  
2  
3  
4 Syrians with a mental health background to provide therapy to Syrians within the  
5  
6  
7 community is a helpful way to promote understanding and empathy while reducing  
8  
9  
10 cultural and language barriers, as suggested by best practice in mental health and  
11  
12  
13 psychosocial support service provision guidelines [6-8]. It is also a sustainable model  
14  
15  
16 of mental health care provision, in line with the United Nation's 2030 Agenda for  
17  
18  
19 Sustainable Development and the Sustainable Development Goals [45,46]. Over time,  
20  
21  
22 Syrian MHPs gain enough experience to become supervisors themselves, increasing  
23  
24  
25 access and resources to mental health care within displaced, conflict-affected  
26  
27  
28 communities. Given the international refugee crisis as a result of the Syrian conflict,  
29  
30  
31 Syrian MHPs are very well placed to support and advise other MHPs who work with  
32  
33  
34 Syrians. It would be worthwhile for Syrian MHPs to provide seminars, lectures,  
35  
36  
37 workshops and consultations on the provision of culturally appropriate and sensitive  
38  
39  
40 support for Syrians.  
41  
42  
43  
44  
45  
46  
47  
48

49 This model also creates the potential for emotional vulnerability in Syrian MHPs.  
50  
51  
52 It is important, then, to ensure adequate supervision where necessary, even if through  
53  
54  
55 online means, to enable MHPs to discuss difficult cases. Peer-support should be  
56  
57  
58 promoted and encouraged in the workplace within this community; this has been found  
59  
60

1  
2  
3  
4 to help prevent and manage secondary traumatic stress [47]. Personal therapy should  
5  
6  
7 also be made available within organisations. Given the stigma of accessing therapy  
8  
9  
10 within Syrian MHPs and the small and well-connected Syrian MHP community in  
11  
12  
13 Turkey, it would be helpful to introduce an Arabic speaking therapist (even if virtually),  
14  
15  
16 who is not a displaced Syrian MHP within this circle, to ensure confidentiality. Despite  
17  
18  
19 high caseloads and pressure given reduced resources, increased emphasis and  
20  
21  
22 awareness of self-care is important, including promoting a work-life balance.  
23  
24  
25  
26  
27

## 28 REFERENCES

- 30 1 Amnesty International. Syria: The worst humanitarian crisis of our time. Syria: Amnesty  
31 International, 2015.  
32  
33
- 34 2 United Nations Office for the Coordination of Humanitarian Affairs. 2018 *Humanitarian Needs*  
35 *Overview: Syrian Arab Republic*, 2017.  
36  
37
- 38 3 Physicians for Human Rights. Anatomy of crisis: a map of attacks in health care in Syria.  
39  
40 <http://syriamap.phr.org/#/en> (accessed 9 March 2019)  
41  
42
- 43 4 Footer KH, Clouse E, Rayes D, et al. Qualitative accounts from Syrian health professionals  
44  
45 regarding violations of the right to health, including the use of chemical weapons, in  
46  
47 opposition-held Syria. *BMJ open*. 2018; 8:e021096.  
48  
49
- 50 5 Fouad FM, Sparrow A, Tarakji A, et al. Health workers and the weaponisation of health care  
51  
52 in Syria: a preliminary inquiry for The Lancet–American University of Beirut Commission on  
53  
54  
55  
56  
57  
58  
59  
60

- 1  
2  
3 Syria. *Lancet*, 2017; 390:2516-26.  
4  
5  
6 6 World Health Organization. mhGAP Humanitarian Intervention Guide (mhGAP-HIG): Clinical  
7  
8 Management of Mental Neurological and Substance Use Conditions in Humanitarian  
9  
10 Emergencies. World Health Organization. 2015.  
11  
12 [https://www.who.int/mental\\_health/publications/mhgap\\_hig/en/](https://www.who.int/mental_health/publications/mhgap_hig/en/) (accessed 10 Apr 2019).  
13  
14  
15  
16  
17 7 World Health Organization, United Nations High Commissioner for Refugees. Assessment  
18  
19 and Management of Conditions Specifically Related to Stress: mhGAP Intervention Guide  
20  
21 Module. World Health Organization. 2013.  
22  
23 [https://www.who.int/mental\\_health/emergencies/mhgap\\_module\\_management\\_stress/en/](https://www.who.int/mental_health/emergencies/mhgap_module_management_stress/en/)  
24  
25 (accessed 10 Apr 2019).  
26  
27  
28  
29  
30  
31  
32 8 Inter-Agency Standing Committee. IASC guidelines on mental health and psychosocial  
33  
34 support in emergency settings. IASC. 2007.  
35  
36 [https://www.who.int/mental\\_health/emergencies/9781424334445/en/](https://www.who.int/mental_health/emergencies/9781424334445/en/) (accessed 10 Apr  
37  
38 2019).  
39  
40  
41  
42  
43  
44 9 El-Khani A, Cartwright K, Ang C, et al. Testing the feasibility of delivering and evaluating a  
45  
46 child mental health recovery program enhanced with additional parenting sessions for families  
47  
48 displaced by the Syrian conflict: A pilot study. *Peace Confl* 2018;24:188.  
49  
50  
51  
52  
53 10 Almoshmosh N, Mobayed M, Aljendi M. Mental health and psychosocial needs of Syrian  
54  
55 refugees and the role of Syrian non-governmental organisations. *BJPsych Int* 2016;13:81-3.  
56  
57  
58  
59  
60

- 1  
2  
3  
4 11 Zaghrou-Hodali M. Humanitarian work using EMDR in Palestine and the Arab world. *J EMDR*  
5  
6 *Practice Research* 2014;8:248-51.  
7  
8  
9  
10 12 Baum N. Shared traumatic reality in communal disasters: Toward a conceptualization.  
11  
12 *Psychotherapy (Chic)* 2010;47:249.  
13  
14  
15 13 Nuttman-Shwartz O, Dekel R. Training students for a shared traumatic reality. *Soc Work*  
16  
17 2008;53:279-81.  
18  
19  
20 14 Cohen K, Collens P. The impact of trauma work on trauma workers: A metasynthesis on  
21  
22 vicarious trauma and vicarious posttraumatic growth. *Psychol Trauma* 2013;5:570.  
23  
24  
25 15 Nuttman-Shwartz O. Shared resilience in a traumatic reality: A new concept for trauma workers  
26  
27 exposed personally and professionally to collective disaster. *Trauma, Violence, & Abuse*  
28  
29 2015;16:466-75.  
30  
31  
32  
33 16 Harb C. The Arab region: cultures, values, and identities. In *Handbook of Arab American*  
34  
35 *psychology*. Routledge; 2015.  
36  
37  
38  
39 17 Hassan G, Ventevogel P, Jefee-Bahloul H, et al. Mental health and psychosocial wellbeing of  
40  
41 Syrians affected by armed conflict. *Epidemiol Psychiatr Sci* 2016;25:129-41.  
42  
43  
44  
45 18 Hill CE, Knox S. Self-disclosure. *Psychotherapy (Chic)* 2001;38(4):413.  
46  
47  
48  
49 19 Baum N. Secondary traumatization in mental health professionals: A systematic review of  
50  
51 gender findings. *Trauma, Violence, & Abuse* 2016;17(2):221-35.  
52  
53  
54  
55 20 Tosone C, Lee M, Bialkin L, et al. Shared trauma: Group reflections on the September 11th  
56  
57 disaster. *Psychoanal. Soc. Work* 2003;10:57-77.  
58  
59  
60

- 1  
2  
3 21 Kirmayer LJ. Asklepian dreams: The ethos of the wounded-healer in the clinical encounter.  
4  
5  
6 Transcult Psychiatry 2003;40:248-77.  
7  
8  
9 22 Miller GD, Baldwin DC. The implications of the wounded healer paradigm for the use of self in  
10  
11 therapy. In Baldwin, M, eds. The use of self in therapy (2nd ed) New York: Haworth Press;  
12  
13  
14 2000.  
15  
16  
17 23 Zerubavel N, Wright MO. The dilemma of the wounded healer. *Psychotherapy* 2012;49:482.  
18  
19  
20 24 Saakvitne KW. Shared trauma: The therapist's increased vulnerability. *Psychoanal dialogues*  
21  
22  
23 2002 17;12:443-9.  
24  
25  
26 25 Tosone C, Nuttman-Shwartz O, Stephens T. Shared trauma: When the professional is  
27  
28 personal. *Clin Soc Work J* 2012 1;40:231-9.  
29  
30  
31 26 O'Brien BC, Harris IB, Beckman TJ, Reed DA, Cook DA. Standards for reporting qualitative  
32  
33 research: a synthesis of recommendations. *Acad Med.* 2014;89(9):1245-1251.  
34  
35  
36 27 Saunders B, Sim J, Kingstone T, et al. Saturation in qualitative research: exploring its  
37  
38 conceptualization and operationalization. *Qual Quant* 2018 1;52:1893-907.  
39  
40  
41 28 McLeod J. Narrative and psychotherapy. Sage; 1997.  
42  
43  
44  
45 29 Barker NC, Pistrang N, Elliott R. Foundations of qualitative methods. Research methods in  
46  
47 clinical psychology: An introduction for students and practitioners. Wiley; 2002.  
48  
49  
50  
51 30 White M, White MK, Wijaya M, et al. Narrative means to therapeutic ends. WW Norton &  
52  
53 Company; 1990.  
54  
55  
56  
57 31 Elliott R, Fischer CT, Rennie DL. Evolving guidelines for publication of qualitative research  
58  
59  
60

- 1  
2  
3 studies in psychology and related fields. *Br J Clin Psychol* 1999;38:215-29.  
4  
5  
6  
7 32 Braun V Clarke V. Using thematic analysis in psychology. *Qual Res Psychol* 2006;3:77-101.  
8  
9  
10 33 Satkunanayagam K, Tunariu A, Tribe R. A qualitative exploration of mental health  
11 professionals' experience of working with survivors of trauma in Sri Lanka. *Int J Cult Ment*  
12 *Health* 2010;3:43-51.  
13  
14  
15  
16  
17 34 Harrison RL, Westwood MJ. Preventing vicarious traumatization of mental health therapists:  
18 Identifying protective practices. *Psychotherapy (Chic)* 2009;46:203.  
19  
20  
21  
22  
23 35 Hunter SV, Schofield MJ. How counsellors cope with traumatized clients: Personal,  
24 professional and organizational strategies. *Int J Adv Couns* 2006;28:121.  
25  
26  
27  
28  
29 36 Lonergan BA, O'Halloran MS, Crane S. The Development of the Trauma Therapist: A  
30 Qualitative Study of the Child Therapist's Perspectives and Experiences. *Brief Treatment &*  
31 *Crisis Intervention* 2004;4.  
32  
33  
34  
35  
36  
37  
38 37 Gelso CJ, Hayes J. Countertransference and the therapist's inner experience: Perils and  
39 possibilities. Routledge; 2007.  
40  
41  
42  
43  
44 38 Sue S, Fujino DC, Hu LT, et al. Community mental health services for ethnic minority groups:  
45 a test of the cultural responsiveness hypothesis. *J Consult Clin Psychol* 1991;59:533.  
46  
47  
48  
49 39 Sue DW, Sue D. Counseling the culturally different: Theory and practice. John Wiley & Sons  
50 Inc; 1999.  
51  
52  
53  
54  
55 40 Chang DF, Berk A. Making cross-racial therapy work: A phenomenological study of clients'  
56 experiences of cross-racial therapy *J Couns Psychol* 2009;56:521.  
57  
58  
59  
60

- 1  
2  
3  
4 41 Cardozo BL, Crawford CG, Eriksson C, et al. Psychological distress, depression, anxiety, and  
5  
6 burnout among international humanitarian aid workers: a longitudinal study. *PloS One*  
7  
8  
9 2012;7:e44948.  
10  
11  
12 42 Miller L. Our own medicine: Traumatized psychotherapists and the stresses of doing therapy.  
13  
14  
15 *Psychotherapy (Chic)* 1998;35:137.  
16  
17  
18 43 Aloud N, Rathur A. Factors affecting attitudes toward seeking and using formal mental health  
19  
20  
21 and psychological services among Arab Muslim populations. *J Muslim Ment Health* 2009;4:79-  
22  
23  
24 103.  
25  
26  
27 44 Pearlman LA, Saakvitne KW. Trauma and the therapist: Countertransference and vicarious  
28  
29  
30 traumatization in psychotherapy with incest survivors. WW Norton & Co; 1995.  
31  
32  
33 45 Nations U. *Transforming our world: The 2030 agenda for sustainable development*. New York:  
34  
35  
36 United Nations, Department of Economic and Social Affairs. 2015.  
37  
38  
39 46 Izutsu T, Tsutsumi A, Minas H, Thornicroft G, Patel V, Ito A. Mental health and wellbeing in the  
40  
41  
42 Sustainable Development Goals. *Lancet Psychiatry* 2015;2:1052-4.  
43  
44  
45 47 Rourke MT. Compassion fatigue in pediatric palliative care providers. *Pediatr Clin North Am*  
46  
47  
48 2007;54:631-44.  
49

## Footnotes

50  
51  
52  
53 **Contributors** AH, AW and KS designed and conceptualised the study. AH coordinated  
54  
55  
56  
57 and carried out the data collection. AH analysed and interpreted the data. AH led  
58  
59  
60



1  
2  
3  
4 manuscript writing with contributions from AW and KS. All authors reviewed the final  
5  
6  
7 manuscript.  
8  
9

10 **Acknowledgements** We would like to thank the Syrian mental health professionals who  
11  
12  
13  
14 dedicated their time and knowledge to make this research possible and we would like  
15  
16  
17 to acknowledge Trauma Aid UK facilitating this research.  
18  
19

20  
21 **Funding** This research was supported by the UCL Doctorate in Clinical Psychology,  
22  
23  
24 funded by Camden & Islington NHS Foundation Trust. It was also supported by a UCL  
25  
26  
27 Grand Challenges grant.  
28  
29

30  
31 **Competing interests** None declared.  
32  
33

34  
35 **Consent** All participants gave informed consent and all data was de-identified.  
36  
37

38 **Ethics approval** This study met the University College London Research Ethics  
39  
40  
41 Committee approved criteria (0163/001).  
42  
43  
44

45 **Data sharing statement** Data are available from the corresponding author upon  
46  
47  
48 reasonable request.  
49  
50  
51

52  
53  
54  
55 **Figure 1. Thematic Map.** Emergent overarching themes, themes and sub-themes with  
56  
57  
58  
59 participant endorsement.  
60

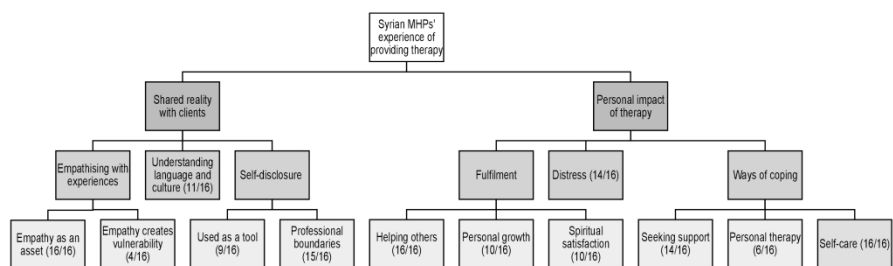

Figure 1. Thematic Map. Emergent overarching themes, themes and sub-themes with participant endorsement.

297x209mm (300 x 300 DPI)

## Standards for Reporting Qualitative Research (SRQR)

O'Brien B.C., Harris, I.B., Beckman, T.J., Reed, D.A., & Cook, D.A. (2014). Standards for reporting qualitative research: a synthesis of recommendations. *Academic Medicine*, 89(9), 1245-1251.

| Number and Topic                              | Reporting Item                                                                                                                                                                                                                                                                                                                           | Page number |
|-----------------------------------------------|------------------------------------------------------------------------------------------------------------------------------------------------------------------------------------------------------------------------------------------------------------------------------------------------------------------------------------------|-------------|
| 1 Title                                       | Concise description of the nature and topic of the study identifying the study as qualitative or indicating the approach (e.g., ethnography, grounded theory) or data collection methods (e.g., interview, focus group) is recommended                                                                                                   | 1           |
| 2 Abstract                                    | Summary of key elements of the study using the abstract format of the intended publication; typically includes objective, methods, results, and conclusions                                                                                                                                                                              | 2           |
| 3 Problem formulation                         | Description and significance of the problem/phenomenon studied; review of relevant theory and empirical work; problem statement                                                                                                                                                                                                          | 3-5         |
| 4 Purpose or research question                | Purpose of the study and specific objectives or questions                                                                                                                                                                                                                                                                                | 6           |
| 5 Qualitative approach and research paradigm  | Qualitative approach (e.g., ethnography, grounded theory, case study, phenomenology, narrative research) and guiding theory if appropriate; identifying the research paradigm (e.g., positivist, constructivist/interpretivist) is also recommended                                                                                      | 6-8         |
| 6 Researcher characteristics and reflexivity  | Researchers' characteristics that may influence the research, including personal attributes, qualifications/experience, relationship with participants, assumptions, or presuppositions; potential or actual interaction between researchers' characteristics and the research questions, approach, methods, results, or transferability | 6, 8, 21    |
| 7 Context                                     | Setting/site and salient contextual factors; rationale                                                                                                                                                                                                                                                                                   | 6-9         |
| 8 Sampling strategy                           | How and why research participants, documents, or events were selected; criteria for deciding when no further sampling was necessary (e.g., sampling saturation); rationale                                                                                                                                                               | 6-7         |
| 9 Ethical issues pertaining to human subjects | Documentation of approval by an appropriate ethics review board and participant consent, or explanation for lack thereof; other confidentiality and data security issues                                                                                                                                                                 | 6-7,23-24   |
| 10 Data collection methods                    | Types of data collected; details of data collection procedures including (as appropriate) start and stop dates of data collection and analysis, iterative process, triangulation of sources/methods, and modification of procedures in response to evolving study findings; rationale                                                    | 6,8         |
| 11 Data collection instruments and            | Description of instruments (e.g., interview guides, questionnaires) and devices (e.g., audio recorders) used                                                                                                                                                                                                                             | 7-8         |

|                                                                                                 |                                                                                                                                                                                                                                                                                                       |       |
|-------------------------------------------------------------------------------------------------|-------------------------------------------------------------------------------------------------------------------------------------------------------------------------------------------------------------------------------------------------------------------------------------------------------|-------|
| technologies                                                                                    | for data collection; if/how the instrument(s) changed over the course of the study                                                                                                                                                                                                                    |       |
| 12 Units of study                                                                               | Number and relevant characteristics of participants, documents, or events included in the study; level of participation (could be reported in results)                                                                                                                                                | 6-7   |
| 13 Data processing                                                                              | Methods for processing data prior to and during analysis, including transcription, data entry, data management and security, verification of data integrity, data coding, and anonymization/deidentification of excerpts                                                                              | 7-8   |
| 14 Data analysis                                                                                | Process by which inferences, themes, etc., were identified and developed, including researchers involved in data analysis; usually references a specific paradigm or approach; rationale <sup>a</sup>                                                                                                 | 7-8   |
| 15 Techniques to enhance trustworthiness                                                        | Techniques to enhance trustworthiness and credibility of data analysis (e.g., member checking, audit trail, triangulation); rationale <sup>a</sup>                                                                                                                                                    | 8     |
| 16 Synthesis and interpretation                                                                 | Main findings (e.g., interpretations, inferences, and themes); might include development of a theory or model, or integration with prior research or theory                                                                                                                                           | 9-18  |
| 17 Links to empirical data                                                                      | Evidence (e.g., quotes, field notes, text excerpts, photographs) to substantiate analytic findings                                                                                                                                                                                                    | 9-18  |
| 18 Integration with prior work, implications, transferability, and contribution(s) to the field | Short summary of main findings; explanation of how findings and conclusions connect to, support, elaborate on, or challenge conclusions of earlier scholarship; discussion of scope of application/generalizability; identification of unique contribution(s) to scholarship in a discipline or field | 18-23 |
| 19 Limitations                                                                                  | Trustworthiness and limitations of findings                                                                                                                                                                                                                                                           | 21    |
| 20 Conflicts of interest                                                                        | Potential sources of influence or perceived influence on study conduct and conclusions; how these were managed                                                                                                                                                                                        | 23    |
| 21 Funding                                                                                      | Sources of funding and other support; role of funders in data collection, interpretation, and reporting                                                                                                                                                                                               | 23    |

# BMJ Open

## Qualitative accounts from Syrian mental health professionals: shared realities in the context of conflict and forced displacement

|                                 |                                                                                                                                                                        |
|---------------------------------|------------------------------------------------------------------------------------------------------------------------------------------------------------------------|
| Journal:                        | <i>BMJ Open</i>                                                                                                                                                        |
| Manuscript ID                   | bmjopen-2019-034291.R2                                                                                                                                                 |
| Article Type:                   | Original research                                                                                                                                                      |
| Date Submitted by the Author:   | 22-Apr-2020                                                                                                                                                            |
| Complete List of Authors:       | Hamid, Aseel; University College London<br>Scior, Katrina; University College London<br>Williams, Amanda; University College London                                    |
| <b>Primary Subject Heading</b>: | Mental health                                                                                                                                                          |
| Secondary Subject Heading:      | Global health, Qualitative research                                                                                                                                    |
| Keywords:                       | Quality in health care < HEALTH SERVICES ADMINISTRATION & MANAGEMENT, MEDICAL EDUCATION & TRAINING, MENTAL HEALTH, QUALITATIVE RESEARCH, Adult psychiatry < PSYCHIATRY |
|                                 |                                                                                                                                                                        |

SCHOLARONE™  
Manuscripts



I, the Submitting Author has the right to grant and does grant on behalf of all authors of the Work (as defined in the below author licence), an exclusive licence and/or a non-exclusive licence for contributions from authors who are: i) UK Crown employees; ii) where BMJ has agreed a CC-BY licence shall apply, and/or iii) in accordance with the terms applicable for US Federal Government officers or employees acting as part of their official duties; on a worldwide, perpetual, irrevocable, royalty-free basis to BMJ Publishing Group Ltd ("BMJ") its licensees and where the relevant Journal is co-owned by BMJ to the co-owners of the Journal, to publish the Work in this journal and any other BMJ products and to exploit all rights, as set out in our [licence](#).

The Submitting Author accepts and understands that any supply made under these terms is made by BMJ to the Submitting Author unless you are acting as an employee on behalf of your employer or a postgraduate student of an affiliated institution which is paying any applicable article publishing charge ("APC") for Open Access articles. Where the Submitting Author wishes to make the Work available on an Open Access basis (and intends to pay the relevant APC), the terms of reuse of such Open Access shall be governed by a Creative Commons licence – details of these licences and which [Creative Commons](#) licence will apply to this Work are set out in our licence referred to above.

Other than as permitted in any relevant BMJ Author's Self Archiving Policies, I confirm this Work has not been accepted for publication elsewhere, is not being considered for publication elsewhere and does not duplicate material already published. I confirm all authors consent to publication of this Work and authorise the granting of this licence.

1  
2  
3  
4 **Qualitative accounts from Syrian mental health professionals: shared realities in the**  
5  
6  
7 **context of conflict and forced displacement**  
8  
9

10 Aseel Hamid<sup>1\*</sup>, Katrina Scior<sup>1</sup> and Amanda C de C Williams<sup>1</sup>  
11  
12

13  
14 <sup>1</sup>Research Department of Clinical, Educational and Health Psychology, University College London,  
15

16  
17 United Kingdom  
18

19  
20 \*Correspondence: [aseel.hamid@ucl.ac.uk](mailto:aseel.hamid@ucl.ac.uk)  
21  
22  
23  
24  
25  
26  
27  
28  
29  
30  
31  
32  
33  
34  
35  
36  
37  
38  
39  
40  
41  
42  
43  
44  
45  
46  
47  
48  
49  
50  
51  
52  
53  
54  
55  
56  
57  
58  
59  
60

## ABSTRACT

**Objectives.** To explore the impact of the provision of care of forcibly displaced Syrian mental health professionals to Syrian clients in the community given shared experiences and backgrounds with clients. **Design.** A qualitative study using thematic analysis of in-depth semi-structured interviews to explore shared realities, self-disclosure and the impact of providing therapy. **Setting.** Syrian mental health professionals operating in Gaziantep and Istanbul, Turkey were interviewed. **Participants.** Sixteen forcibly displaced Syrian mental health professionals (8 male, 8 female) aged between 24 and 54 years ( $M = 35$  years,  $SD = 8.3$  years) who provided care to the displaced Syrian community in Turkey. **Results.** All workers described having a shared reality with their clients as helpful in therapy and a smaller proportion described it as a vulnerability. All described their work with Syrian clients as fulfilling and most described it as distressing. Participants referred to self-care, supervision, peer-support and personal therapy as a means to cope. **Conclusions.** This study provides the first insight into the shared experiences of the ongoing trauma, loss and violations resulting from the ongoing Syrian conflict from the perspective of Syrian



1  
2  
3 mental health professionals, adding to the literature of the professional issues and  
4  
5  
6  
7 ethical duty to protect health workers in conflict settings.  
8  
9

### 10 **Strengths and limitations of this study**

- 14 • This study is the first to explore the experiences of forcibly displaced Syrian  
15  
16  
17 mental health workers and the shared reality of Syrian mental health workers  
18  
19  
20 and their Syrian clients using in-depth semi-structured interviews and thematic  
21  
22  
23 analysis.  
24  
25
- 26 • The first author is an Arabic speaker and mental health professional who  
27  
28 interviewed participants in their native Arabic language.  
29  
30  
31
- 32 • This is an exploratory study of a small sample of forcibly displaced mental  
33  
34  
35 health workers in Turkey.  
36  
37  
38
- 39 • Due to the limited literature on Syrian mental health workers, these findings  
40  
41  
42 have implications for the ethical duty to protect Syrian mental health workers  
43  
44  
45 through the provision of adequate support in conflict and post-conflict settings.  
46  
47  
48  
49  
50  
51

### 52 **BACKGROUND**

53  
54  
55 The ongoing Syrian conflict, seen as the worst humanitarian crisis of our time [1], has  
56  
57  
58 led to the displacement of half of Syria's population with over 13.1 million Syrians in  
59  
60

1  
2  
3  
4 need of humanitarian assistance leading to an ongoing public health crisis [2]. The  
5  
6  
7 Syrian healthcare community has been a target of the military strategy led by the  
8  
9  
10 Syrian government with reports of 478 attacks on medical facilities with 830 medical  
11  
12  
13  
14 personnel killed since the beginning of the conflict [3] and ongoing systematic  
15  
16  
17 violations of international humanitarian law, including the use of missiles, sniper and  
18  
19  
20 chemical attacks on hospitals and ambulances and the torture of health care workers  
21  
22  
23  
24 [4,5]. The majority of published literature sheds light on the impact of medical  
25  
26  
27  
28 personnel, yet to our knowledge no literature exists on the impact of the conflict on  
29  
30  
31  
32 mental health workers.

33  
34  
35 Widely endorsed global mental health programmes and guidelines emphasise  
36  
37  
38 the importance of working with communities and influential community figures, and  
39  
40  
41 where specialist support is required, guidelines recommend referring clients for  
42  
43  
44 evidence-based trauma therapies such as eye movement desensitisation and  
45  
46  
47 reprocessing (EMDR) and trauma-focussed cognitive behavioural therapy where  
48  
49  
50 trained and supervised therapists are available [6-8]. Consequently, expatriate Syrian  
51  
52  
53 mental health professionals (MHPs), various Syrian non-governmental organisations  
54  
55  
56 (NGOs) and international NGOs (INGOs) have made initiatives to provide training and  
57  
58  
59  
60

1  
2  
3 supervision for evidence-based therapies to displaced Syrians [9-11]. While doing so  
4  
5  
6 mobilises resources, reduces language barriers and enhances cultural sensitivity, it  
7  
8  
9  
10 also comes with challenges including high caseloads with reduced opportunities for  
11  
12  
13 supervision given the lack of qualified supervisors relative to demand, with potential  
14  
15  
16  
17 negative emotional consequences.  
18  
19

20  
21 The term 'shared traumatic reality' refers to situations where both professional  
22  
23 and client have been exposed to the same communal disaster, and 'double exposure'  
24  
25 refers to health professionals' exposure both as professionals providing a service and  
26  
27 as members of the community [12,13]. Most studies of a shared traumatic reality are  
28  
29 based on quantitative enquiry. A qualitative meta-synthesis of studies of the impact of  
30  
31 trauma work on trauma workers found themes related to emotional and somatic  
32  
33 reactions to trauma work such as sadness, helplessness, nausea and despair,  
34  
35 changes to schemas and behaviours such as questioning themselves and their lives  
36  
37 and perceiving the world as unsafe [14]. While much research focuses on the potential  
38  
39 negative consequences, recent research is acknowledging the potential for shared  
40  
41 resilience in a traumatic reality [15].  
42  
43  
44  
45  
46  
47  
48  
49  
50  
51  
52  
53  
54  
55  
56  
57  
58  
59  
60

1  
2  
3  
4 Very little literature exists on Syrian MHPs warranting in-depth exploration to  
5  
6  
7 understand their context and experience. Despite intra- and inter-variations within  
8  
9  
10 Arab cultures, the influence of Syrian culture contributes to differential  
11  
12  
13 conceptualisations, processes and experiences such as kissing and hugging  
14  
15  
16 strangers in same-sex greetings, asking about family and offering food or drink given  
17  
18  
19 the deep-rooted values of family and hospitality in Arab culture [16,17] likely  
20  
21  
22 influencing the MHP-client dyad. Given these Syrian-Arab cultural frameworks and the  
23  
24  
25 shared ongoing trauma reality of Syrian MHPs and clients, it is unclear what this reality  
26  
27  
28 looks like and it how differs (or not) from a context of Western mental health care.  
29  
30  
31  
32  
33  
34

35 In a typical Western therapeutic context, self-disclosure is used cautiously,  
36  
37  
38 occurs infrequently and often relates to MHPs' professional background rather than  
39  
40  
41 personal details [18]. Disasters, regardless of geographical location, often create  
42  
43  
44 boundary ambiguity between the personal and professional with the penetration of  
45  
46  
47 demands from neighbours, friends and acquaintances which can lead to burnout and  
48  
49  
50 strong countertransference arousal responses [19]. A shared traumatic reality creates  
51  
52  
53 a feeling of universality leading to increased MHP self-disclosure [20]. Appropriate  
54  
55  
56 self-disclosure allows the MHP, as the "wounded healer" [21], to show their  
57  
58  
59  
60

1  
2  
3 resourcefulness and to instil hope in clients of healing and recovery [22,23]; at the  
4  
5  
6  
7 same time, increased self-disclosure within a shared reality can increase MHPs'  
8  
9  
10 vulnerability for distress [24,25].  
11  
12  
13

14         It is unclear how or whether MHPs' self-disclosure, in any capacity, features  
15  
16  
17 within these therapeutic dyads. It is expected that a shared reality in the context of  
18  
19  
20 Syrian culture may lend itself to MHPs' self-disclosure, particularly within Turkey where  
21  
22  
23 Syrians are living within a small city, and that there are very few MHPs relative to  
24  
25  
26 residents. Many Syrian MHPs are themselves forcibly displaced, have witnessed and  
27  
28  
29 experienced traumatic events and, given the ongoing nature of the conflict, have an  
30  
31  
32 ongoing sense of hopelessness and loss. The term 'forcibly displaced' is used  
33  
34  
35 throughout this paper to capture those who are seeking asylum as well as refugees.  
36  
37  
38  
39  
40  
41 The Syrian MHP-client dyad creates a shared reality that, to the researchers'  
42  
43  
44 knowledge, has not been explored. An investigation of this context is warranted, along  
45  
46  
47  
48 with what allows Syrian MHPs to continue to function in their capacity as healers, and  
49  
50  
51  
52 what coping consists of within a displaced Syrian context.  
53  
54  
55  
56  
57  
58  
59  
60

1  
2  
3  
4 This research aims to generate knowledge carved directly from Syrian MHPs'  
5  
6  
7 experiences of providing therapy within a shared Syrian culture and displacement  
8  
9  
10 context.  
11  
12

## 13 14 **METHODS**

15  
16  
17 Semi-structured interviews were conducted in Arabic by the first author (AH) with  
18  
19  
20 forcibly displaced Syrian MHPs across two cities in Turkey, Istanbul and Gaziantep,  
21  
22  
23 the latter being a city 97 km north of Aleppo, Syria, in August and November 2017.  
24  
25  
26 Turkey is home to the largest number of Syrian refugees and the majority live along  
27  
28  
29 the southern border, with around half a million Syrians living in Gaziantep, a city used  
30  
31  
32 as a hub for cross-border support, hosting Syrian and INGOs. Trauma Aid UK, an  
33  
34  
35 INGO who provide specialist trauma training for Syrian health professionals in Turkey  
36  
37  
38 facilitated the recruitment of participants.  
39  
40  
41  
42  
43  
44

45 The interviewer, AH, is a female Iraqi British MHP with clinical experience of  
46  
47  
48 mental health and conflict, conducting research as part of her doctoral thesis. It is  
49  
50  
51 likely that her characteristics have influenced all levels of the research cycle.  
52  
53

54 Through reflexivity AH used her clinical experience and cultural background to place  
55  
56  
57 herself in a unique position to carry out this research using experiential knowledge to  
58  
59  
60

1  
2  
3 enhance understanding. Participants were open to discussion during interviews and  
4  
5  
6  
7 all expressed keenness to participate given the potential for this research to help  
8  
9  
10 others.

11  
12  
13  
14 The study aimed to (1) investigate the nature and influence of the shared  
15  
16  
17 culture and experiences of forced displacement within the Syrian MHP-client dyad  
18  
19  
20 (2) explore the nature and impact of MHPs' disclosure of shared experiences and (3)  
21  
22  
23 examine the perceived impact of providing therapy on MHPs and the associated  
24  
25  
26 means of coping. Reporting adheres to the standards for reporting qualitative  
27  
28  
29 research (SRQR) recommendations [26].  
30  
31  
32

### 33 34 35 **Participants**

36  
37  
38 Participants consisted of a purposive sample of 16 forcibly displaced Syrian MHPs  
39  
40  
41 residing in Turkey working with Syrian clients, aged between 24 and 54 years ( $M = 35$ ,  
42  
43  
44  $SD = 8.3$ ), 8 males and 8 females, 12 psychologists and 4 psychiatrists. Participants  
45  
46  
47 were recruited through Trauma Aid UK's mailing list and word of mouth. All participants  
48  
49  
50 were given information sheets and consent forms (in Arabic). Participants were aware  
51  
52  
53 prior to interview that participation was entirely voluntary, the interviewer was not  
54  
55  
56 affiliated with Trauma Aid UK, and all information provided would be encrypted, stored  
57  
58  
59  
60

1  
2  
3  
4 securely and anonymised through the use of identification codes throughout analysis  
5  
6  
7 and dissemination. Permission for audio recording was sought and granted. Interviews  
8  
9  
10 were recorded using the Olympus DS-3500 recorder which protects against  
11  
12  
13 unintended access by a 128-bit real-time file encryption. Interviews were conducted  
14  
15  
16 either in Gaziantep ( $n = 11$ ), Istanbul ( $n = 3$ ) or via Skype ( $n = 2$ ) and lasted between  
17  
18  
19 40 and 70 minutes. The sample size was determined by data saturation; the degree  
20  
21  
22 to which new data repeated what was expressed in previous data [27].  
23  
24  
25

### 26 27 28 **Measurement and analysis**

29  
30  
31 The interview schedule was guided by the research questions and structured in a way  
32  
33  
34 to encourage participants to tell their story using three basic narrative structures; a  
35  
36  
37 beginning (such as 'In what way do you experience similarities between you and your  
38  
39  
40 clients?'), in which the setting was described, a middle which contains a series of  
41  
42  
43 obstacles and attempted solutions (e.g. 'Do you talk with your clients about your own  
44  
45  
46 experiences?') and an ending or resolution (for example 'What resources do you draw  
47  
48  
49 on that help with the challenging aspects of doing therapy?') [28]. Given that little is  
50  
51  
52 known in the literature about this sample, open-ended, exploratory questions were  
53  
54  
55 used [29] as well as externalising questions derived from a narrative approach to  
56  
57  
58  
59  
60



1  
2  
3 encourage participants to feel more comfortable to have an open dialogue [30]. The  
4  
5  
6  
7 research aimed to be grounded in examples and these were elicited where relevant  
8  
9  
10 [31]. There were no changes made to the interview schedule over the course of the  
11  
12  
13  
14 research.  
15

16  
17 A thematic analysis was conducted by AH using an inductive approach  
18  
19  
20 following the six steps recommended by Braun and Clarke [32] using NVivo 11  
21  
22  
23 software. AH and two bilingual British Syrian health professionals transcribed the  
24  
25 interview from Arabic audio to English script and each script was read and reread and  
26  
27  
28 systematically coded, giving full and equal attention to each item. A peer researcher  
29  
30  
31 independently coded a randomly chosen transcript using the same procedure outlined  
32  
33  
34 above, and any discrepancies were resolved through discussion. AH used mind maps  
35  
36  
37 to construct a thematic structure while being mindful of personal biases and influences.  
38  
39  
40  
41  
42 These themes were reviewed with the research team (KS, AW) to discuss whether  
43  
44  
45 this was an accurate depiction; consequently, themes were renamed and reorganised.  
46  
47  
48  
49  
50  
51  
52 Data analysis took place between December 2017 and April 2018.  
53  
54

### 55 **Patient and public involvement**

56

57  
58  
59 No patients or members of the public were involved in the conduct of this research.  
60

## RESULTS

### Situating the context

Prior to presenting the main themes emerging from the interviews, the context in which the Syrian MHPs described working is presented here. Syrian MHPs spoke of a number of facilitators to mental health provision. All participants referred to a number of specific psychological tools such as receiving psychological therapy training sessions as well as non-specific tools such as adopting an empathic, non-judgmental stance. Flexible ways of working through Skype or Whatsapp and providing therapy in people's homes also facilitated therapy. Participants spoke of the importance of psychosocial support including the use of psychological first aid and linking clients to activities and social centres.

“The main thing is to provide people with their main needs, not only food and water but also their human rights. We tried to change the mentality of the psychologists and the psychological workers to be able to support the people affected by the crisis.” (P5)

There were also a number of barriers. Participants reported feeling under pressure due to high workloads and consequently only being able to provide a limited

1  
2  
3  
4 number of sessions. Participants stated that clients were reluctant to talk about their  
5  
6  
7 mental health problems and traumatic experiences, especially sexual abuse, with a  
8  
9  
10 general stigma present within the Syrian community accompanied by a lack of  
11  
12  
13 awareness of psychology.  
14  
15

16  
17 "They always say: 'Am I a crazy person?' I face this word 'crazy' a lot."  
18  
19

20  
21 (P1)  
22  
23

24 Some expressed the need for more trained therapists, risk management staff  
25  
26  
27 and sensitive interpreters. Financial difficulties were described both as a barrier to the  
28  
29  
30 provision of adequate mental health care and training and to patients accessing  
31  
32  
33 services due to not being able to travel to sessions.  
34  
35  
36  
37

## 38 Main Themes

39  
40

41 Analysis led to two overarching themes of shared characteristics and personal impact,  
42  
43  
44 with six themes and ten sub-themes; Figure 1 illustrates these themes.  
45  
46  
47

48 *<Insert Figure 1 about here>*  
49  
50

51 *Shared reality*  
52  
53

54  
55  
56 Empathising with experiences  
57  
58  
59  
60

1  
2  
3  
4 Syrian MHPs lived through war and were forcibly displaced themselves and directly  
5  
6  
7 and indirectly experienced traumatic events. This enabled them to empathise with  
8  
9  
10 clients' experience. All referred to this as an asset creating better understanding and  
11  
12  
13  
14 trust within therapy.  
15

16  
17  
18 "...they have family who has been detained and I have family who is  
19  
20  
21 detained. Some have family who they have not seen for a long time and  
22  
23  
24 I too have not seen my family for a long time, because of the war...It lets  
25  
26  
27 you be more empathic, sometimes you be may be able to relieve him  
28  
29  
30 more...it makes you have more motivation, it makes you feel how much  
31  
32  
33 he is literally suffering." (P3)  
34  
35  
36  
37

38  
39 A smaller proportion of MHPs gave examples of how sharing a traumatic reality  
40  
41 led to unpleasant reminders, some preferring not to go into too much detail to avoid  
42  
43  
44  
45 over-identification and emotional harm.  
46  
47

48  
49 "...a male patient, he was in prison and was subject to a lot of torture...I  
50  
51  
52 always heard about these things but I never thought I will see it in reality.  
53  
54  
55 It was hard for me because afterwards I thought that my brother [who  
56  
57  
58 was imprisoned and possibly killed in Syria] might have gone through  
59  
60

1  
2  
3 the same things” (P1)  
4  
5  
6

7 “I do not go into a lot of details with [the client] about the problem, so as  
8  
9  
10 not to empathise to the extent that I feel that our problem is one” (P16)  
11  
12  
13

#### 14 Understanding language and culture 15

16  
17 As well as having shared experiences, Syrian MHPs shared the language and culture  
18  
19 of their clients. MHPs commented on how their nuanced understanding of Syrian  
20  
21 dialects allows them to link a clients’ dialect to their cultural, religious, political and  
22  
23 social contexts. Their understanding of cultural and religious norms and practices such  
24  
25 as the male-female relationship in relation to disclosing emotional experiences,  
26  
27 physical touch and using words of comfort appropriately according to a clients’ spiritual  
28  
29 context was a useful tool.  
30  
31  
32  
33  
34  
35  
36  
37  
38  
39  
40  
41

42 “We tried in our work to have females treat males but it did not work. This  
43  
44 is in our culture, it is shameful for males to talk about his problems with  
45  
46 females and this is why males prefer to talk with male doctor. So we  
47  
48 started to refer males to males and females to us [females].”(P1)  
49  
50  
51  
52  
53  
54

55 “So if [a client] says my son became a martyr, you don't just say ‘oh ok’  
56  
57 and write it down and then what... you make them feel that you heard  
58  
59  
60

1  
2  
3 them...and say oh Allah rest his soul, and Allah willing he's now in  
4  
5  
6  
7 heaven and may his martyrdom be a reason for your redemption” (P3)  
8  
9

## 10 Self-disclosure

11  
12  
13  
14 The majority of Syrian MHPs used self-disclosure as a tool in therapy with varied uses;  
15  
16  
17 to help clients see the MHP as an example of having overcome difficulties given their  
18  
19  
20 shared experience, or for political purposes to build the clients' trust given the tensions  
21  
22  
23 and conflicts within in Syria, particularly if clients come from different areas. One MHP  
24  
25  
26  
27  
28 noted that:

29  
30  
31 “...[most of my clients] are originally from rural Aleppo and they speak in  
32  
33  
34 a different accent as I come from Douma...Patients ask me where I am  
35  
36  
37 from. This question could come from the fear inside them that I have  
38  
39  
40 different political views or I might report them to the Syrian regime. In  
41  
42  
43 this case, I tell them that I am from Douma which they know that it has  
44  
45  
46 gone through the same experience as rural Aleppo.” (P14)  
47  
48  
49  
50

51  
52 All MHPs gave disclaimers regarding self-disclosure, either relating to  
53  
54  
55 professional boundaries, their psychological approach or their social context. MHPs  
56  
57  
58 were more likely to use disclosure to reduce perceived power imbalances:  
59  
60

1  
2  
3  
4 “...when he comes to see a therapist or doctor, he thinks that the  
5  
6  
7 therapist/doctor comes from another planet and doesn't know the  
8  
9  
10 struggle that he goes through. So we talk about general issues like  
11  
12  
13 there's a lot of traffic, public transport is expensive., rent is going up for  
14  
15  
16 us as Syrians, living in Turkey is expensive ...he feels that you've  
17  
18  
19 experienced the same struggle...” (P3)  
20  
21  
22  
23

24 MHPs spoke about the importance of the use of professional boundaries as a  
25  
26 way to protect the client, themselves and the relationship using contracts, fixed hours  
27  
28  
29 of contact and placing responsibility onto clients.  
30  
31  
32  
33

34  
35 “Sometimes the relationship becomes unprofessional when I start to use  
36  
37  
38 the phone to call them and see how they are doing. When [I feel this] ...  
39  
40  
41 I reduce the number of sessions and give her the responsibility to make  
42  
43  
44 her...life choices.” (P10)  
45  
46  
47  
48

49 “This is what made a difference - listening to stories made me stronger  
50  
51  
52 and now I was able to override this feeling [of being overwhelmed by  
53  
54  
55 traumatic stories] and have immunity and I put a separation between me  
56  
57  
58 and the client so that I don't get affected.” (P16)  
59  
60

1  
2  
3  
4 *Personal impact of therapy*  
5  
6

7 Fulfilment  
8  
9

10 All MHPs spoke about how knowing that they have helped and relieved their clients  
11  
12  
13  
14 was rewarding, and for some, this acted as a main motivator to help overcome the  
15  
16  
17 emotional difficulties of this work:  
18

19  
20  
21 “...the thing that protects me is to complete therapy [with a client] and  
22  
23  
24 see the improvement and change that happened. The person who came  
25  
26  
27 completely destroyed and began to love life... when you see the  
28  
29  
30 change...this is the biggest thing that pushes me through difficulties”  
31  
32

33  
34  
35 (P16)  
36  
37

38 MHPs spoke about how their clients taught them things that enabled them to  
39  
40  
41 grow emotionally and that listening to difficult and traumatic stories over the years  
42  
43  
44 helped to make them more immune to distress as MHPs:  
45  
46  
47

48  
49 “I used to tell my teacher I do not think I can treat people in the future  
50  
51  
52 because I lost my brother... she told me you will be able to do it because  
53  
54  
55 you are Syrian and you know Arabic and you will be a role model for  
56  
57  
58 those people who you will meet. Now [with time] I think this true because  
59  
60



1  
2  
3 when I see Syrians who are struggling I can feel what they are going  
4  
5  
6  
7 though. Jalaluddin Rumi said that the wound in your heart is the place  
8  
9  
10 where light enters you.” (P1)  
11  
12  
13

14 Most of the Syrian MHPs identified as Muslim and most also spoke about  
15  
16  
17 gaining spiritual satisfaction from helping others, with some saying that they felt their  
18  
19  
20 purpose was to be brought from the war to help others who are affected, and others  
21  
22  
23 saying they feel satisfied that God will reward them for their work.  
24  
25  
26

## 27 Distress

28  
29  
30  
31 As well as the fulfilling aspects of therapy, MHPs also spoke about the personal  
32  
33  
34 negative impact of clients’ traumatic stories, describing experiencing secondary  
35  
36  
37 traumatic stress and burnout:  
38  
39  
40

41  
42 “At the beginning of my experience I was by myself with a lot of trauma  
43  
44  
45 cases I felt that I was burnt out...and that I was trapped. I was not happy,  
46  
47  
48 I started having nightmares because I was exposed to very big issues  
49  
50  
51 such as incest, physical and sexual assaults, losing body parts and  
52  
53  
54 suicide” (P1)  
55  
56  
57

58  
59 “The other day I was working at the orphanage and I saw 11 people in  
60

1  
2  
3 one day...this is a big number and causes pressure, mental exhaustion  
4  
5  
6  
7 and burnout. Sometimes you're tired and you need to take a day  
8  
9  
10 off...your capacity becomes less...and this is...we all...this is burnout.”

11  
12  
13  
14 (P3)

15  
16  
17 “To be honest, sometimes at the end of the day I feel that I am unable to  
18  
19  
20 speak anymore, around 5.30 when we finish our work” (P4)

21  
22  
23  
24 MHPs also mentioned feeling shocked by the traumatic experiences that their clients  
25  
26  
27 endured. This shock often came with MHPs empathising and bearing witness to the  
28  
29  
30 reality that individuals experienced such atrocities, rather than seeing them as abstract  
31  
32  
33 events spoken about or reported in media outlets.

34  
35  
36  
37  
38  
39 “These were things...I only heard about and did not expect that it existed  
40  
41  
42 in reality and that I will see it in the real world.” (P1)

43  
44  
45  
46 “I was shocked by what [the children] went through...” (P10)

47  
48  
49 “I used to think it's unbelievable all this pain happened to us, I can't  
50  
51  
52 believe to this extent; really is it possible that this shelling happened,  
53  
54  
55 these things happened inside prisons?” (P16)

## Ways of coping

All Syrian MHPs had their individual ways of coping with the emotional impact of therapy. All spoke about the importance of seeking support and increasing their knowledge through supervision, resources or peer support:

“Peer support is also important, your colleagues around you, it is not the same as supervision, but it helps.” (P8)

“You need to work with the skills and the responsibilities that you have, rather than trying to do things you’re not qualified for...[K]eeping up with literature, Cochrane reviews and so on...I try to keep up to date.” (P9)

MHPs also spoke about the importance of having support through friends or family to talk about their own difficulties:

“Sometimes when I have problems in my life or with my son, it is hard to always listen to all people, sometimes it is a very simple thing but you feel you need someone to ask about you....you just need to talk to someone.” (P4)

Six participants spoke about using personal therapy to cope with difficulties so that they can provide better care to their clients, despite this being stigmatised within

1  
2  
3  
4 the community and that this was often not spoken about:  
5  
6

7       Personal therapy is useful. First, it allows me to put myself in my  
8  
9  
10       patients' position, this makes me feel humble. Second, it gives me the  
11  
12  
13       chance to explore the perspectives of other therapists and how they see  
14  
15  
16  
17       things. Third, when there is an issue that is overwhelming, personal  
18  
19  
20  
21       therapy gives me the space to speak out about it". (PA)  
22

23  
24       "On the social level, people still have stigma about psychology...we  
25  
26  
27       don't tell each other that we need help but we still go and seek the help.  
28  
29

30  
31       We still have the stigma about psychology treatment." (PA)  
32

33  
34       All participants spoke about self-care, often as spending time either with loved  
35  
36  
37       ones or alone without thinking or speaking about work and being around nature:  
38  
39

40  
41  
42       "Gaziantep has a lot of big and beautiful gardens where we go and spend  
43  
44  
45       time, sometimes we meet friends, but also sometimes you feel you just  
46  
47  
48       want to be on your own." (P4)  
49

50  
51  
52       "My wife has started to follow my cases and understand my work. She  
53  
54  
55       says to me 'where is the self-care?! You train on self-care but we want  
56  
57  
58       you to do self-care with us!' [laughter] she's like 'Let's go to the ocean  
59  
60

1  
2  
3  
4 this year', so we will go with the kids." (P9)  
5  
6

## 7 DISCUSSION

8  
9  
10 To our knowledge, this is the first study to shed light on the experiences of forcibly  
11  
12  
13  
14 displaced Syrian MHPs providing services to Syrians affected by conflict. This was a  
15  
16  
17 qualitative exploration of challenges faced by Syrian MHPs amongst the shortages of  
18  
19  
20 mental health provision, high caseloads and emotional vulnerability in light of shared  
21  
22  
23 traumatic experiences with clients, while illuminating the satisfaction gained from  
24  
25  
26 providing therapy using multiple means of coping. The shared reality of practitioner  
27  
28  
29 and client enhances empathy and understanding and overcomes language and  
30  
31  
32 cultural barriers often present in these settings where there is a gap between the  
33  
34  
35 demand and supply of mental health services.  
36  
37  
38  
39  
40

41  
42 Published literature, particularly using quantitative methodology, tends to  
43  
44  
45 conceptualise positive and negative impacts of therapy provision as separate and  
46  
47  
48 mutually exclusive entities. However, a qualitative exploration of Sri Lankan MHPs  
49  
50  
51 working with Sri Lankan survivors of trauma described "an accumulated negative  
52  
53  
54 emotional impact but also to simultaneously contain positive, growth-promoting and  
55  
56  
57 personally satisfying aspects" [33]. Another qualitative study of trauma therapists  
58  
59  
60

1  
2  
3 showed positive changes co-occurred alongside negative emotional impacts [34].  
4  
5

6  
7 These mirror this study's findings, where fulfilment and distress emerged as parallel  
8  
9  
10 themes relating to the overarching theme of the personal impact of therapy. There is  
11  
12  
13 a need to further investigate the coexistence and interaction of the positive and  
14  
15  
16  
17 negative impacts of therapy provision, particularly where there is a shared reality.  
18  
19

20  
21 The concept of a shared resilience in a traumatic reality goes some way in  
22  
23  
24 understanding this, yet this concept has not been addressed sufficiently [15].  
25  
26

27  
28 Syrian MHPs spoke about the shock of the human rights abuses inflicted on  
29  
30  
31 their clients by the Syrian government, including torture and sexual abuse, particularly  
32  
33  
34 early on in their working lives. This fits with broader qualitative research capturing  
35  
36  
37 shock as a theme experienced by counsellors in Sydney working in child protection  
38  
39  
40 services [35] and child trauma therapists in America [36]. Similarly, time and  
41  
42  
43 experience were key moderators of the negative emotional impact in both studies;  
44  
45  
46 more time and experience led to less distress and overwhelming emotions.  
47  
48  
49

50  
51  
52 Previous research suggests that MHPs' own difficult experiences may facilitate  
53  
54  
55 empathic connection with clients, and this may allow MHPs to be more aware of the  
56  
57  
58 thoughts and feelings that clients invoke within them, facilitating helpful reactions to  
59  
60

1  
2  
3  
4 client material [37]. The shared reality of all Syrian MHPs facilitated empathy,  
5  
6  
7 enhancing their sense of compassion satisfaction and bonding, allowing them to feel  
8  
9  
10 more competent in helping their clients [20]. This shared reality also enabled greater  
11  
12  
13 understanding of cultural nuances and language; an important strength given the lack  
14  
15  
16 of available sensitively trained interpreters and that matching MHPs to clients based  
17  
18  
19 on language similarities has been shown to predict better therapy outcomes [38].  
20  
21  
22

23  
24 In some cases, clients' war-related traumatic experiences reminded Syrian  
25  
26  
27 MHPs of their own experiences and some MHPs noted not going into too much detail  
28  
29  
30 about the clients' distressing experiences to avoid over-identification. It is unclear  
31  
32  
33 whether or how this may affect the therapy process, particularly when processing or  
34  
35  
36 reliving trauma, as theoretical underpinnings of both EMDR and trauma focussed  
37  
38  
39 cognitive behavioural therapy require clients to bring to mind and/or verbalise  
40  
41  
42 necessary detail. Shared realities led to challenges that this data may not have  
43  
44  
45 captured. Literature on ethnic minority therapists working with ethnic minority clients  
46  
47  
48 reveals challenges including therapist over-identification leading to assumptions and  
49  
50  
51 potential clashes in cultural values [39], the latter also likely challenges for Syrian  
52  
53  
54 MHPs working with Syrians residing in a Turkish majority country.  
55  
56  
57  
58  
59  
60

1  
2  
3  
4 Syrian MHPs in this study reported using self-disclosure cautiously while  
5  
6  
7 maintaining professional boundaries, despite theory on shared trauma in a traumatic  
8  
9  
10 reality predicting greater self-disclosure, blurred boundaries and burnout [12]. It is  
11  
12  
13 possible that adherence to professional boundaries, encouraged by training sessions  
14  
15  
16 that many Syrian MHPs received, contributed to protecting participants from the  
17  
18  
19 experience of burnout. Syrian MHPs in similar social and financial situations to their  
20  
21  
22 clients reported using disclosure as a way to gain common ground, in contrast to more  
23  
24  
25 privileged MHPs actively not disclosing. Previous research with cross-cultural dyads  
26  
27  
28 showed that therapist self-disclosure was only perceived as helpful when used as an  
29  
30  
31 “effective strategy for bridging perceived social and power distance” [40].  
32  
33  
34  
35  
36  
37

38  
39 Longitudinal research with INGO workers showed that social support was  
40  
41  
42 associated with lower levels of depression, burnout, lack of personal accomplishment  
43  
44  
45 and greater life satisfaction [41]; self-care amongst Syrian MHPs was often located in  
46  
47  
48 the context of social support. MHPs need to have insight into their feelings and the  
49  
50  
51 ability to differentiate between the needs of the self and of the client [42]. A number of  
52  
53  
54 Syrian MHPs described personal therapy as a helpful means to do this and as a way  
55  
56  
57 to cope with emotional distress despite a stigma surrounding this. MHPs experience  
58  
59  
60



1  
2  
3 barriers to disclosure of undertaking personal therapy with negative consequences  
4  
5  
6  
7 such as being seen as incompetent [23]. Syrian MHPs seeking personal therapy are  
8  
9  
10 likely to experience double stigma given that mental health problems have been  
11  
12  
13 described amongst the Syrian community in this research as highly stigmatised, as  
14  
15  
16 well as within Arab communities overall [43].  
17  
18  
19

20  
21 Syrian MHPs collectively experience the ongoing Syrian conflict on a daily basis  
22  
23  
24 through media outlets, while hearing first-hand accounts from clients, family and  
25  
26  
27 friends about the ongoing human rights violations committed in the context of the  
28  
29  
30 failure of the international community and law. This may damage their sense of hope,  
31  
32  
33 connection and faith in humanity. Maintaining optimism and hopefulness are essential  
34  
35  
36 aspects of being an effective trauma therapist [44]. A number of Syrian MHPs' strong  
37  
38  
39 sense of faith in God and their purpose was a way to make sense of incomprehensible  
40  
41  
42 violations and to maintain hope. Spirituality also brought a sense of satisfaction to a  
43  
44  
45 number of participants and Syrian MHPs saw their work as a good deed towards a  
46  
47  
48 wider struggle and a wider cause.  
49  
50  
51  
52  
53  
54

55 The findings are subject to some limitations. Given that a large part of  
56  
57  
58 recruitment was through Trauma Aid's channels, there may have been an unspoken  
59  
60

1  
2  
3 message that the nature of their involvement would be linked to Trauma Aid, despite  
4  
5  
6  
7 emphasis on the voluntary nature of their involvement and the separation of the  
8  
9  
10 interviewer and this research. Although a number of participants did discuss the  
11  
12  
13 challenges they faced, boundary violations and personal disclosure, this may have  
14  
15  
16  
17 created more of a reluctance in openly discussing such topics. Furthermore, the  
18  
19  
20 information sheet and content of interviews may have led those who are struggling to  
21  
22  
23  
24 understandably opt out, therefore creating a less representative sample and greater  
25  
26  
27  
28 impression of coping. This research is a result of the interaction of a small research  
29  
30  
31 team, including a bilingual interviewer, with a specific group of displaced Syrian MHPs  
32  
33  
34  
35 in the specific context of Turkey, and this should be considered regarding applicability  
36  
37  
38 of findings. However, the use of a transparent approach, credibility checks and  
39  
40  
41 emphasis on reflexivity throughout the process allows for replicability of the  
42  
43  
44  
45 methodology with different groups and contexts. It would be worthwhile to extend this  
46  
47  
48  
49 research to other contexts where Syrians are forcibly displaced, such as in Jordan,  
50  
51  
52 Lebanon, Germany and within Syria. Mental health provision is likely to differ in each  
53  
54  
55  
56 of these contexts given the differences in the numbers of forcibly displaced Syrians,  
57  
58  
59 the majority language and culture of the country, the socio-political context and the  
60

1  
2  
3  
4 available resources; further research could shed light on this.  
5  
6

7           The findings from this snapshot of Syrian MHPs may suggest that training local  
8  
9  
10 Syrians with a mental health background to provide therapy to Syrians within the  
11  
12  
13 community is a helpful way to promote understanding and empathy while reducing  
14  
15  
16 cultural and language barriers, as suggested by best practice in mental health and  
17  
18  
19 psychosocial support service provision guidelines [6-8]. It is also a sustainable model  
20  
21  
22 of mental health care provision, in line with the United Nation's 2030 Agenda for  
23  
24  
25 Sustainable Development and the Sustainable Development Goals [45,46]. Over time,  
26  
27  
28 Syrian MHPs gain enough experience to become supervisors themselves, increasing  
29  
30  
31 access and resources to mental health care within displaced, conflict-affected  
32  
33  
34 communities. Given the international refugee crisis as a result of the Syrian conflict,  
35  
36  
37 Syrian MHPs are very well placed to support and advise other MHPs who work with  
38  
39  
40 Syrians. It would be worthwhile for Syrian MHPs to provide seminars, lectures,  
41  
42  
43 workshops and consultations on the provision of culturally appropriate and sensitive  
44  
45  
46 support for Syrians. It would be worthwhile for Syrian MHPs to provide seminars, lectures,  
47  
48  
49 workshops and consultations on the provision of culturally appropriate and sensitive  
50  
51  
52 support for Syrians.  
53  
54

55           This model also creates the potential for emotional vulnerability in Syrian MHPs.  
56  
57  
58 It is important, then, to ensure adequate supervision where necessary, even if through  
59  
60

1  
2  
3 online means, to enable MHPs to discuss difficult cases. Peer-support should be  
4  
5  
6  
7 promoted and encouraged in the workplace within this community; this has been found  
8  
9  
10 to help prevent and manage secondary traumatic stress [47]. Personal therapy should  
11  
12  
13 also be made available within organisations. Given the stigma of accessing therapy  
14  
15  
16 within Syrian MHPs and the small and well-connected Syrian MHP community in  
17  
18 Turkey, it would be helpful to introduce an Arabic speaking therapist (even if virtually),  
19  
20  
21 who is not a displaced Syrian MHP within this circle, to ensure confidentiality. Despite  
22  
23  
24 high caseloads and pressure given reduced resources, increased emphasis and  
25  
26  
27 awareness of self-care is important, including promoting a work-life balance.  
28  
29  
30  
31  
32  
33  
34

## 35 REFERENCES

- 36  
37 1 Amnesty International. Syria: The worst humanitarian crisis of our time. Syria: Amnesty  
38  
39 International, 2015.  
40  
41
- 42  
43 2 United Nations Office for the Coordination of Humanitarian Affairs. 2018 *Humanitarian Needs*  
44  
45 *Overview: Syrian Arab Republic*, 2017.  
46  
47
- 48  
49 3 Physicians for Human Rights. Anatomy of crisis: a map of attacks in health care in Syria.  
50  
51 <http://syriamap.phr.org/#/en> (accessed 9 March 2019)  
52  
53
- 54  
55 4 Footer KH, Clouse E, Rayes D, et al. Qualitative accounts from Syrian health professionals  
56  
57 regarding violations of the right to health, including the use of chemical weapons, in  
58  
59  
60

- 1  
2  
3 opposition-held Syria. *BMJ open*. 2018; 8:e021096.  
4  
5  
6 5 Fouad FM, Sparrow A, Tarakji A, et al. Health workers and the weaponisation of health care  
7  
8 in Syria: a preliminary inquiry for The Lancet–American University of Beirut Commission on  
9  
10 in Syria. *Lancet*, 2017; 390:2516-26.  
11  
12  
13  
14  
15 6 World Health Organization. mhGAP Humanitarian Intervention Guide (mhGAP-HIG): Clinical  
16  
17 Management of Mental Neurological and Substance Use Conditions in Humanitarian  
18  
19 Emergencies. World Health Organization. 2015.  
20  
21  
22  
23 [https://www.who.int/mental\\_health/publications/mhgap\\_hig/en/](https://www.who.int/mental_health/publications/mhgap_hig/en/) (accessed 10 Apr 2019).  
24  
25  
26  
27 7 World Health Organization, United Nations High Commissioner for Refugees. Assessment  
28  
29 and Management of Conditions Specifically Related to Stress: mhGAP Intervention Guide  
30  
31 Module. World Health Organization. 2013.  
32  
33  
34  
35 [https://www.who.int/mental\\_health/emergencies/mhgap\\_module\\_management\\_stress/en/](https://www.who.int/mental_health/emergencies/mhgap_module_management_stress/en/)  
36  
37 (accessed 10 Apr 2019).  
38  
39  
40  
41 8 Inter-Agency Standing Committee. IASC guidelines on mental health and psychosocial  
42  
43 support in emergency settings. IASC. 2007.  
44  
45  
46  
47 [https://www.who.int/mental\\_health/emergencies/9781424334445/en/](https://www.who.int/mental_health/emergencies/9781424334445/en/) (accessed 10 Apr  
48  
49 2019).  
50  
51  
52  
53 9 El-Khani A, Cartwright K, Ang C, et al. Testing the feasibility of delivering and evaluating a  
54  
55 child mental health recovery program enhanced with additional parenting sessions for families  
56  
57 displaced by the Syrian conflict: A pilot study. *Peace Confl* 2018;24:188.  
58  
59  
60

- 1  
2  
3  
4 10 Almoshmosh N, Mobayed M, Aljendi M. Mental health and psychosocial needs of Syrian  
5  
6 refugees and the role of Syrian non-governmental organisations. *BJPsych Int* 2016;13:81-3.  
7  
8  
9 11 Zaghrout-Hodali M. Humanitarian work using EMDR in Palestine and the Arab world. *J EMDR*  
10  
11 *Practice Research* 2014;8:248-51.  
12  
13  
14 12 Baum N. Shared traumatic reality in communal disasters: Toward a conceptualization.  
15  
16 *Psychotherapy (Chic)* 2010;47:249.  
17  
18  
19 13 Nuttman-Shwartz O, Dekel R. Training students for a shared traumatic reality. *Soc Work*  
20  
21 2008;53:279-81.  
22  
23  
24 14 Cohen K, Collens P. The impact of trauma work on trauma workers: A metasynthesis on  
25  
26 vicarious trauma and vicarious posttraumatic growth. *Psychol Trauma* 2013;5:570.  
27  
28  
29 15 Nuttman-Shwartz O. Shared resilience in a traumatic reality: A new concept for trauma workers  
30  
31 exposed personally and professionally to collective disaster. *Trauma, Violence, & Abuse*  
32  
33 2015;16:466-75.  
34  
35  
36 16 Harb C. The Arab region: cultures, values, and identities. In *Handbook of Arab American*  
37  
38  
39  
40  
41  
42  
43  
44  
45  
46  
47  
48  
49  
50  
51  
52  
53  
54  
55  
56  
57  
58  
59  
60 17 Hassan G, Ventevogel P, Jefee-Bahloul H, et al. Mental health and psychosocial wellbeing of  
18  
19  
20  
21  
22  
23  
24  
25  
26  
27  
28  
29  
30  
31  
32  
33  
34  
35  
36  
37  
38  
39  
40  
41  
42  
43  
44  
45  
46  
47  
48  
49  
50  
51  
52  
53  
54  
55  
56  
57  
58  
59  
60  
61  
62  
63  
64  
65  
66  
67  
68  
69  
70  
71  
72  
73  
74  
75  
76  
77  
78  
79  
80  
81  
82  
83  
84  
85  
86  
87  
88  
89  
90  
91  
92  
93  
94  
95  
96  
97  
98  
99  
100  
101  
102  
103  
104  
105  
106  
107  
108  
109  
110  
111  
112  
113  
114  
115  
116  
117  
118  
119  
120  
121  
122  
123  
124  
125  
126  
127  
128  
129  
130  
131  
132  
133  
134  
135  
136  
137  
138  
139  
140  
141  
142  
143  
144  
145  
146  
147  
148  
149  
150  
151  
152  
153  
154  
155  
156  
157  
158  
159  
160  
161  
162  
163  
164  
165  
166  
167  
168  
169  
170  
171  
172  
173  
174  
175  
176  
177  
178  
179  
180  
181  
182  
183  
184  
185  
186  
187  
188  
189  
190  
191  
192  
193  
194  
195  
196  
197  
198  
199  
200  
201  
202  
203  
204  
205  
206  
207  
208  
209  
210  
211  
212  
213  
214  
215  
216  
217  
218  
219  
220  
221  
222  
223  
224  
225  
226  
227  
228  
229  
230  
231  
232  
233  
234  
235  
236  
237  
238  
239  
240  
241  
242  
243  
244  
245  
246  
247  
248  
249  
250  
251  
252  
253  
254  
255  
256  
257  
258  
259  
260  
261  
262  
263  
264  
265  
266  
267  
268  
269  
270  
271  
272  
273  
274  
275  
276  
277  
278  
279  
280  
281  
282  
283  
284  
285  
286  
287  
288  
289  
290  
291  
292  
293  
294  
295  
296  
297  
298  
299  
300  
301  
302  
303  
304  
305  
306  
307  
308  
309  
310  
311  
312  
313  
314  
315  
316  
317  
318  
319  
320  
321  
322  
323  
324  
325  
326  
327  
328  
329  
330  
331  
332  
333  
334  
335  
336  
337  
338  
339  
340  
341  
342  
343  
344  
345  
346  
347  
348  
349  
350  
351  
352  
353  
354  
355  
356  
357  
358  
359  
360  
361  
362  
363  
364  
365  
366  
367  
368  
369  
370  
371  
372  
373  
374  
375  
376  
377  
378  
379  
380  
381  
382  
383  
384  
385  
386  
387  
388  
389  
390  
391  
392  
393  
394  
395  
396  
397  
398  
399  
400  
401  
402  
403  
404  
405  
406  
407  
408  
409  
410  
411  
412  
413  
414  
415  
416  
417  
418  
419  
420  
421  
422  
423  
424  
425  
426  
427  
428  
429  
430  
431  
432  
433  
434  
435  
436  
437  
438  
439  
440  
441  
442  
443  
444  
445  
446  
447  
448  
449  
450  
451  
452  
453  
454  
455  
456  
457  
458  
459  
460  
461  
462  
463  
464  
465  
466  
467  
468  
469  
470  
471  
472  
473  
474  
475  
476  
477  
478  
479  
480  
481  
482  
483  
484  
485  
486  
487  
488  
489  
490  
491  
492  
493  
494  
495  
496  
497  
498  
499  
500  
501  
502  
503  
504  
505  
506  
507  
508  
509  
510  
511  
512  
513  
514  
515  
516  
517  
518  
519  
520  
521  
522  
523  
524  
525  
526  
527  
528  
529  
530  
531  
532  
533  
534  
535  
536  
537  
538  
539  
540  
541  
542  
543  
544  
545  
546  
547  
548  
549  
550  
551  
552  
553  
554  
555  
556  
557  
558  
559  
560  
561  
562  
563  
564  
565  
566  
567  
568  
569  
570  
571  
572  
573  
574  
575  
576  
577  
578  
579  
580  
581  
582  
583  
584  
585  
586  
587  
588  
589  
590  
591  
592  
593  
594  
595  
596  
597  
598  
599  
600  
601  
602  
603  
604  
605  
606  
607  
608  
609  
610  
611  
612  
613  
614  
615  
616  
617  
618  
619  
620  
621  
622  
623  
624  
625  
626  
627  
628  
629  
630  
631  
632  
633  
634  
635  
636  
637  
638  
639  
640  
641  
642  
643  
644  
645  
646  
647  
648  
649  
650  
651  
652  
653  
654  
655  
656  
657  
658  
659  
660  
661  
662  
663  
664  
665  
666  
667  
668  
669  
670  
671  
672  
673  
674  
675  
676  
677  
678  
679  
680  
681  
682  
683  
684  
685  
686  
687  
688  
689  
690  
691  
692  
693  
694  
695  
696  
697  
698  
699  
700  
701  
702  
703  
704  
705  
706  
707  
708  
709  
710  
711  
712  
713  
714  
715  
716  
717  
718  
719  
720  
721  
722  
723  
724  
725  
726  
727  
728  
729  
730  
731  
732  
733  
734  
735  
736  
737  
738  
739  
740  
741  
742  
743  
744  
745  
746  
747  
748  
749  
750  
751  
752  
753  
754  
755  
756  
757  
758  
759  
760  
761  
762  
763  
764  
765  
766  
767  
768  
769  
770  
771  
772  
773  
774  
775  
776  
777  
778  
779  
780  
781  
782  
783  
784  
785  
786  
787  
788  
789  
790  
791  
792  
793  
794  
795  
796  
797  
798  
799  
800  
801  
802  
803  
804  
805  
806  
807  
808  
809  
810  
811  
812  
813  
814  
815  
816  
817  
818  
819  
820  
821  
822  
823  
824  
825  
826  
827  
828  
829  
830  
831  
832  
833  
834  
835  
836  
837  
838  
839  
840  
841  
842  
843  
844  
845  
846  
847  
848  
849  
850  
851  
852  
853  
854  
855  
856  
857  
858  
859  
860  
861  
862  
863  
864  
865  
866  
867  
868  
869  
870  
871  
872  
873  
874  
875  
876  
877  
878  
879  
880  
881  
882  
883  
884  
885  
886  
887  
888  
889  
890  
891  
892  
893  
894  
895  
896  
897  
898  
899  
900  
901  
902  
903  
904  
905  
906  
907  
908  
909  
910  
911  
912  
913  
914  
915  
916  
917  
918  
919  
920  
921  
922  
923  
924  
925  
926  
927  
928  
929  
930  
931  
932  
933  
934  
935  
936  
937  
938  
939  
940  
941  
942  
943  
944  
945  
946  
947  
948  
949  
950  
951  
952  
953  
954  
955  
956  
957  
958  
959  
960  
961  
962  
963  
964  
965  
966  
967  
968  
969  
970  
971  
972  
973  
974  
975  
976  
977  
978  
979  
980  
981  
982  
983  
984  
985  
986  
987  
988  
989  
990  
991  
992  
993  
994  
995  
996  
997  
998  
999  
1000

- 1  
2  
3  
4 20 Tosone C, Lee M, Bialkin L, et al. Shared trauma: Group reflections on the September 11th  
5  
6 disaster. *Psychoanal. Soc. Work* 2003;10:57-77.  
7  
8  
9 21 Kirmayer LJ. Asklepian dreams: The ethos of the wounded-healer in the clinical encounter.  
10  
11  
12 *Transcult Psychiatry* 2003;40:248-77.  
13  
14  
15 22 Miller GD, Baldwin DC. The implications of the wounded healer paradigm for the use of self in  
16  
17 therapy. In Baldwin, M, eds. *The use of self in therapy* (2nd ed) New York: Haworth Press;  
18  
19 2000.  
20  
21  
22  
23 23 Zerubavel N, Wright MO. The dilemma of the wounded healer. *Psychotherapy* 2012;49:482.  
24  
25  
26 24 Saakvitne KW. Shared trauma: The therapist's increased vulnerability. *Psychoanal dialogues*  
27  
28 2002 17;12:443-9.  
29  
30  
31  
32 25 Tosone C, Nuttman-Shwartz O, Stephens T. Shared trauma: When the professional is  
33  
34 personal. *Clin Soc Work J* 2012 1;40:231-9.  
35  
36  
37  
38 26 O'Brien BC, Harris IB, Beckman TJ, Reed DA, Cook DA. Standards for reporting qualitative  
39  
40 research: a synthesis of recommendations. *Acad Med.* 2014;89(9):1245-1251.  
41  
42  
43  
44 27 Saunders B, Sim J, Kingstone T, et al. Saturation in qualitative research: exploring its  
45  
46 conceptualization and operationalization. *Qual Quant* 2018 1;52:1893-907.  
47  
48  
49 28 McLeod J. *Narrative and psychotherapy*. Sage; 1997.  
50  
51  
52  
53 29 Barker NC, Pistrang N, Elliott R. *Foundations of qualitative methods. Research methods in*  
54  
55 *clinical psychology: An introduction for students and practitioners*. Wiley; 2002.  
56  
57  
58  
59 30 White M, White MK, Wijaya M, et al. *Narrative means to therapeutic ends*. WW Norton &  
60

- 1  
2  
3 Company; 1990.  
4  
5  
6 31 Elliott R, Fischer CT, Rennie DL. Evolving guidelines for publication of qualitative research  
7  
8 studies in psychology and related fields. *Br J Clin Psychol* 1999;38:215-29.  
9  
10  
11 32 Braun V Clarke V. Using thematic analysis in psychology. *Qual Res Psychol* 2006;3:77-101.  
12  
13  
14 33 Satkunanayagam K, Tunariu A, Tribe R. A qualitative exploration of mental health  
15  
16 professionals' experience of working with survivors of trauma in Sri Lanka. *Int J Cult Ment*  
17  
18 *Health* 2010;3:43-51.  
19  
20  
21 34 Harrison RL, Westwood MJ. Preventing vicarious traumatization of mental health therapists:  
22  
23 Identifying protective practices. *Psychotherapy (Chic)* 2009;46:203.  
24  
25  
26 35 Hunter SV, Schofield MJ. How counsellors cope with traumatized clients: Personal,  
27  
28 professional and organizational strategies. *Int J Adv Couns* 2006;28:121.  
29  
30  
31 36 Lonergan BA, O'Halloran MS, Crane S. The Development of the Trauma Therapist: A  
32  
33 Qualitative Study of the Child Therapist's Perspectives and Experiences. *Brief Treatment &*  
34  
35 *Crisis Intervention* 2004;4.  
36  
37  
38 37 Gelso CJ, Hayes J. Countertransference and the therapist's inner experience: Perils and  
39  
40 possibilities. Routledge; 2007.  
41  
42  
43 38 Sue S, Fujino DC, Hu LT, et al. Community mental health services for ethnic minority groups:  
44  
45 a test of the cultural responsiveness hypothesis. *J Consult Clin Psychol* 1991;59:533.  
46  
47  
48 39 Sue DW, Sue D. Counseling the culturally different: Theory and practice. John Wiley & Sons  
49  
50  
51 Inc; 1999.  
52  
53  
54  
55  
56  
57  
58  
59  
60



- 1  
2  
3 40 Chang DF, Berk A. Making cross-racial therapy work: A phenomenological study of clients'  
4  
5  
6 experiences of cross-racial therapy *J Couns Psychol* 2009;56:521.  
7  
8  
9 41 Cardozo BL, Crawford CG, Eriksson C, et al. Psychological distress, depression, anxiety, and  
10  
11  
12 burnout among international humanitarian aid workers: a longitudinal study. *PloS One*  
13  
14  
15 2012;7:e44948.  
16  
17  
18 42 Miller L. Our own medicine: Traumatized psychotherapists and the stresses of doing therapy.  
19  
20  
21 *Psychotherapy (Chic)* 1998;35:137.  
22  
23  
24 43 Aloud N, Rathur A. Factors affecting attitudes toward seeking and using formal mental health  
25  
26  
27 and psychological services among Arab Muslim populations. *J Muslim Ment Health* 2009;4:79-  
28  
29  
30 103.  
31  
32  
33 44 Pearlman LA, Saakvitne KW. Trauma and the therapist: Countertransference and vicarious  
34  
35  
36 traumatization in psychotherapy with incest survivors. WW Norton & Co; 1995.  
37  
38  
39 45 Nations U. *Transforming our world: The 2030 agenda for sustainable development*. New York:  
40  
41  
42 United Nations, Department of Economic and Social Affairs. 2015.  
43  
44  
45 46 Izutsu T, Tsutsumi A, Minas H, Thornicroft G, Patel V, Ito A. Mental health and wellbeing in the  
46  
47  
48 Sustainable Development Goals. *Lancet Psychiatry* 2015;2:1052-4.  
49  
50  
51 47 Rourke MT. Compassion fatigue in pediatric palliative care providers. *Pediatr Clin North Am*  
52  
53  
54 2007;54:631-44.  
55

## Footnotes

**Contributors** AH, AW and KS designed and conceptualised the study. AH coordinated

1  
2  
3 and carried out the data collection. AH analysed and interpreted the data. AH led  
4  
5  
6  
7 manuscript writing with contributions from AW and KS. All authors reviewed the final  
8  
9  
10 manuscript.  
11  
12

13  
14 **Acknowledgements** We would like to thank the Syrian mental health professionals who  
15  
16  
17 dedicated their time and knowledge to make this research possible and we would like  
18  
19  
20 to acknowledge Trauma Aid UK facilitating this research.  
21  
22

23  
24 **Funding** This research was supported by the UCL Doctorate in Clinical Psychology,  
25  
26  
27 funded by Camden & Islington NHS Foundation Trust. It was also supported by a UCL  
28  
29  
30 Grand Challenges grant.  
31  
32

33  
34  
35 **Competing interests** None declared.  
36  
37

38  
39 **Consent** All participants gave informed consent and all data was de-identified.  
40  
41

42 **Ethics approval** This study met the University College London Research Ethics  
43  
44  
45 Committee approved criteria (0163/001).  
46  
47

48  
49 **Data sharing statement** Data are available from the corresponding author upon  
50  
51  
52 reasonable request.  
53  
54

55  
56 **Figure 1. Thematic Map.** Emergent overarching themes, themes and sub-themes with  
57  
58  
59 participant endorsement.  
60



Figure 1. Thematic Map. Emergent overarching themes, themes and sub-themes with participant endorsement.

297x209mm (300 x 300 DPI)

## Standards for Reporting Qualitative Research (SRQR)

O'Brien B.C., Harris, I.B., Beckman, T.J., Reed, D.A., & Cook, D.A. (2014). Standards for reporting qualitative research: a synthesis of recommendations. *Academic Medicine*, 89(9), 1245-1251.

| Number and Topic                              | Reporting Item                                                                                                                                                                                                                                                                                                                           | Page number |
|-----------------------------------------------|------------------------------------------------------------------------------------------------------------------------------------------------------------------------------------------------------------------------------------------------------------------------------------------------------------------------------------------|-------------|
| 1 Title                                       | Concise description of the nature and topic of the study identifying the study as qualitative or indicating the approach (e.g., ethnography, grounded theory) or data collection methods (e.g., interview, focus group) is recommended                                                                                                   | 1           |
| 2 Abstract                                    | Summary of key elements of the study using the abstract format of the intended publication; typically includes objective, methods, results, and conclusions                                                                                                                                                                              | 2           |
| 3 Problem formulation                         | Description and significance of the problem/phenomenon studied; review of relevant theory and empirical work; problem statement                                                                                                                                                                                                          | 3-5         |
| 4 Purpose or research question                | Purpose of the study and specific objectives or questions                                                                                                                                                                                                                                                                                | 6           |
| 5 Qualitative approach and research paradigm  | Qualitative approach (e.g., ethnography, grounded theory, case study, phenomenology, narrative research) and guiding theory if appropriate; identifying the research paradigm (e.g., positivist, constructivist/interpretivist) is also recommended                                                                                      | 6-8         |
| 6 Researcher characteristics and reflexivity  | Researchers' characteristics that may influence the research, including personal attributes, qualifications/experience, relationship with participants, assumptions, or presuppositions; potential or actual interaction between researchers' characteristics and the research questions, approach, methods, results, or transferability | 6, 8, 21    |
| 7 Context                                     | Setting/site and salient contextual factors; rationale                                                                                                                                                                                                                                                                                   | 6-9         |
| 8 Sampling strategy                           | How and why research participants, documents, or events were selected; criteria for deciding when no further sampling was necessary (e.g., sampling saturation); rationale                                                                                                                                                               | 6-7         |
| 9 Ethical issues pertaining to human subjects | Documentation of approval by an appropriate ethics review board and participant consent, or explanation for lack thereof; other confidentiality and data security issues                                                                                                                                                                 | 6-7,23-24   |
| 10 Data collection methods                    | Types of data collected; details of data collection procedures including (as appropriate) start and stop dates of data collection and analysis, iterative process, triangulation of sources/methods, and modification of procedures in response to evolving study findings; rationale                                                    | 6,8         |
| 11 Data collection instruments and            | Description of instruments (e.g., interview guides, questionnaires) and devices (e.g., audio recorders) used                                                                                                                                                                                                                             | 7-8         |

|                                                                                                 |                                                                                                                                                                                                                                                                                                       |       |
|-------------------------------------------------------------------------------------------------|-------------------------------------------------------------------------------------------------------------------------------------------------------------------------------------------------------------------------------------------------------------------------------------------------------|-------|
| technologies                                                                                    | for data collection; if/how the instrument(s) changed over the course of the study                                                                                                                                                                                                                    |       |
| 12 Units of study                                                                               | Number and relevant characteristics of participants, documents, or events included in the study; level of participation (could be reported in results)                                                                                                                                                | 6-7   |
| 13 Data processing                                                                              | Methods for processing data prior to and during analysis, including transcription, data entry, data management and security, verification of data integrity, data coding, and anonymization/deidentification of excerpts                                                                              | 7-8   |
| 14 Data analysis                                                                                | Process by which inferences, themes, etc., were identified and developed, including researchers involved in data analysis; usually references a specific paradigm or approach; rationale <sup>a</sup>                                                                                                 | 7-8   |
| 15 Techniques to enhance trustworthiness                                                        | Techniques to enhance trustworthiness and credibility of data analysis (e.g., member checking, audit trail, triangulation); rationale <sup>a</sup>                                                                                                                                                    | 8     |
| 16 Synthesis and interpretation                                                                 | Main findings (e.g., interpretations, inferences, and themes); might include development of a theory or model, or integration with prior research or theory                                                                                                                                           | 9-18  |
| 17 Links to empirical data                                                                      | Evidence (e.g., quotes, field notes, text excerpts, photographs) to substantiate analytic findings                                                                                                                                                                                                    | 9-18  |
| 18 Integration with prior work, implications, transferability, and contribution(s) to the field | Short summary of main findings; explanation of how findings and conclusions connect to, support, elaborate on, or challenge conclusions of earlier scholarship; discussion of scope of application/generalizability; identification of unique contribution(s) to scholarship in a discipline or field | 18-23 |
| 19 Limitations                                                                                  | Trustworthiness and limitations of findings                                                                                                                                                                                                                                                           | 21    |
| 20 Conflicts of interest                                                                        | Potential sources of influence or perceived influence on study conduct and conclusions; how these were managed                                                                                                                                                                                        | 23    |
| 21 Funding                                                                                      | Sources of funding and other support; role of funders in data collection, interpretation, and reporting                                                                                                                                                                                               | 23    |
